1

2

3 **Tissue interactions govern pattern**  
4 **formation in the posterior lateral line of**  
5 **medaka**

6

7 Ali Seleit<sup>1,2,3</sup>, Karen Gross<sup>1,2</sup>, Jasmin Onistschenko<sup>1</sup>, Oi Pui Hoang<sup>1</sup>,  
8 Jonas Theelke<sup>1</sup>, Lázaro Centanin<sup>1</sup>

9

10 1 Laboratory of Clonal Analysis of Post-Embryonic Stem Cells, Centre for Organismal Studies  
11 (COS) Heidelberg, Im Neuenheimer Feld 230, Heidelberg Universität, 69120 Heidelberg, Germany.

12 2 The Hartmut Hoffmann-Berling International Graduate School of Molecular and Cellular Biology  
13 (HBIGS), University of Heidelberg, Heidelberg, Germany.

14 3 Current address: Dev Biology Unit, EMBL Heidelberg, Meyerhofstrasse 1, 69117, Heidelberg,  
15 Germany.

16

17 Author for Correspondence: [lazaro.centanin@cos.uni-heidelberg.de](mailto:lazaro.centanin@cos.uni-heidelberg.de)

18

19 Running Title: Epithelial integrity & pLL pattern.

# 1 Abstract

2 Vertebrate organs are arranged in a stereotypic, species-specific position along the animal body  
3 plan. Substantial morphological variation exists between related species, especially so in the vastly  
4 diversified teleost clade. It is still unclear how tissues, organs and systems can accommodate such  
5 diverse scaffolds. Here, we use the sequential formation of neuromasts in the posterior lateral line  
6 (pLL) system of medaka fish to address tissue-interactions defining a pattern. We show that the  
7 pLL pattern is established independently of its neuronal wiring, and demonstrate that the neuromast  
8 precursors that constitute the pLL behave as autonomous units during pattern construction. We  
9 uncover the necessity of epithelial integrity for correct pLL patterning by disrupting *keratin 15* (*krt15*)  
10 and creating epithelial lesions that lead to novel neuromast positioning. By using *krt15/wt* chimeras,  
11 we determined that the new pLL pattern depends exclusively on the mutant epithelium, which  
12 instructs *wt* neuromast to locate ectopically. Inducing epithelial lesions by 2-photon laser ablation  
13 during pLL morphogenesis phenocopies *krt15* genetic mutants and reveals that epithelial integrity  
14 defines the final position of the embryonic pLL neuromasts. Our results show that a fine-balance  
15 between primordium intrinsic properties and instructive interactions with the surrounding tissues is  
16 necessary to achieve proper organ morphogenesis and patterning. We speculate that this logic  
17 likely facilitates the accommodation of sensory modules to changing and diverse body plans.

# 1 Introduction

2 Among the members of an animal species, organs are arranged in fixed numbers and stereotypic  
3 positions along the body. Subtle or major variations that occur between related species have  
4 necessarily evolved by maintaining organ functionality and association with the rest of the tissues in  
5 the organism. There is a plethora of body sizes and patterns in the animal kingdom, where teleost  
6 fish in particular have mastered body alteration and re-shaping. How the different tissues, organs  
7 and systems can scale and accommodate to such diverse scaffolds is still poorly understood. So is  
8 the impact of changes in one tissue on another, *i.e* the hierarchical organisation governing these  
9 changes.

10 The reproducibility of developmental programs during organogenesis appears to be an intrinsic  
11 property of the system, as self-organising programs were revealed using different organoid models  
12 during the last decade (Eiraku et al., 2011; Lancaster et al., 2013; Sato et al., 2009; Turner et al.,  
13 2016; van den Brink et al., 2014). Organ location, on the other hand, is achieved in two different  
14 manners depending on the animal model. Cases like *C. elegans* constitute a clear example of a  
15 fixed, deterministic lineage where the precise temporal and spatial order guarantees the formation  
16 of cell types and tissues in a *defined* location (Sulston et al., 1983) . Most vertebrates analysed follow  
17 another developmental logic, though, where an initial symmetry break will induce the appearance of  
18 different cell types, tissues and eventually organs (Martinez Arias and Steventon, 2018). Induction  
19 events constitute examples of how cell types and tissues interact with each other to instruct their  
20 timely appearance at *relative* locations. The rationale that emerges for vertebrate organogenesis is  
21 that of an initial plasticity - *where* the tissue will be formed - followed by a fixed, self-organising  
22 programme - *how* the organ will form. How variations in tissue interactions could result in new  
23 patterns during development remains largely unknown.

24 The lateral line is a sensory system whose organs, the neuromasts, distribute along the surface of  
25 fish and amphibia (Sape de et al.,2002; Ghysen and Dambly-Chaudi re, 2007). Their exposed  
26 location and unique morphology have made them a popular model to tackle several aspects of  
27 organogenesis. Many groups have contributed to our extensive understanding of the signalling  
28 pathways shaping the embryonic lateral line system in zebrafish (Aman and Piotrowski, 2008; Chitnis  
29 et al., 2012; David et al., 2002; Grant et al., 2005; Haas and Gilmour, 2006; Hern andez et al., 2006;  
30 Lecaudey et al., 2008; L pez-Schier and Hudspeth, 2005; Lush and Piotrowski, 2014; Ma et al.,  
31 2008; Nechiporuk and Raible, 2008; Pinto-Teixeira et al., 2015; Romero-Carvajal et al., 2015;  
32 S nchez et al., 2016; Wada et al., 2013b; Wibowo et al., 2011). Briefly, a primordium migrates  
33 concurrently with the pLL nerve and associated glia along the horizontal myoseptum and deposits a  
34 handful of pre-formed neuromasts from its rear edge (Ghysen and Dambly-Chaudi re, 2007; Grant

1 et al., 2005; Lecaudey et al., 2008; López-Schier and Hudspeth, 2005; Lush and Piotrowski, 2014;  
2 Nechiporuk and Raible, 2008). Additional primordia will migrate later, expanding the initial set of  
3 organs during the larval stages (Ghysen and Dambly-Chaudière, 2007; Ledent, 2002; Nuñez et al.,  
4 2009; Sapède et al., 2002; Whitfield, 2005). Some aspects of lateral line formation have been  
5 reported as well in different fish species, including tuna, *Astyanax* and medaka (Ghysen et al., 2012;  
6 Ghysen et al., 2010; Pichon and Ghysen, 2004; Sapède et al., 2002; Seleit et al., 2017a; Seleit et  
7 al., 2017b). The availability of genetic tools in medaka allowed a dynamic study of neuromast  
8 generation, which revealed that one primordium is responsible for the sequential generation of two  
9 different, parallel lateral lines (Seleit et al., 2017a). A first set of neuromasts is deposited by the  
10 primordium (*primary* neuromasts) and move ventrally immediately after deposition to form the ventral  
11 pLL. Later, a second set of organs (*secondary* neuromasts) is formed between each pair of primary  
12 neuromasts and migrate dorsally to form the midline pLL (Figure 1). The posterior lateral line in  
13 medaka at the end of embryogenesis, therefore, represents a unique neuromast pattern that  
14 deviates from that of previously studied fish.

15 Here, we use the sequential formation and opposite migration of neuromasts in medaka to address  
16 the tissue interactions necessary to build a pattern. By using 2-photon laser ablations we discard  
17 any role for the lateral line nerve and the associated glial cells in pattern formation and organ  
18 numbers. We then analyse transgenic lines labelling the pLL of medaka mutants with duplicated  
19 body sectors to demonstrate that primary neuromasts resolve organ positioning in an autonomous  
20 manner. Despite autonomous neuromast location, our 4D analysis reveals intrinsic properties of the  
21 pLL system. Namely, one secondary organ forms in between two primaries, and all secondary  
22 neuromasts inevitably locate to the midline, irrespective of the relative position of their founder cells.  
23 We also generate viable *keratin 15* mutants to reveal that the integrity of the epithelium influences  
24 the embryonic pattern of the medaka pLL. We confirm these results by mechanically interfering with  
25 epithelial integrity locally and recapitulate the patterning defects observed in our *krt15* mutants. Our  
26 results strongly suggest that tissue interactions govern lateral line pattern formation and that  
27 patterning in this system is resolved locally and autonomously by neuromast organ precursors.  
28 Pattern construction in the medaka pLL is governed by a balance of intrinsic primordium properties  
29 and extrinsic influences from its immediate environment, where the modulation of the latter can easily  
30 lead to novel pLL patterns. We speculate that this plasticity is exploited evolutionarily to generate  
31 novel pLL patterns accommodating the diverse sizes and body-plans of teleost fish.

# 1 Results

## 2 **pLL nerve and associated glia dispensable for correct pLL pattern and organ numbers in** 3 **medaka**

4 The embryonic pLL pattern construction in medaka involves highly stereotypic organ movements  
5 and positioning. Primary neuromasts are deposited at the midline and will end up ventrally, while  
6 secondary organs, formed ventrally, will locate to the midline (Seleit et al., 2017a). It is still unclear  
7 what drives the ventral movement of primary organs during the initial phases of pLL pattern  
8 formation. A major difference between primary deposited organs from the primordium and  
9 secondary forming ones is that primary neuromasts are connected to the pLL nerve as they are  
10 formed (Seleit et al., 2017a). To test whether the pLL nerve can act instructively to guide the  
11 positioning of primary organs to the ventral side we decided to target the nerve by two-photon laser  
12 ablation. We utilized *Eya1:mCFP*, *K15:H2B-RFP* embryos, where membrane-tagged cyan  
13 fluorescent protein guarantees a clear labelling of the nerve, and the nuclear tagged red fluorescent  
14 protein labels the mature neuromasts of the pLL (Figure 2A-A'). We performed a high precision  
15 injury to a specific segment of the pLL nerve in 3-4 dpf embryos, when the primordium has already  
16 deposited a number of primary organs at the midline (Figure 2B-B''). We were able to leave the  
17 primordium, the deposited neuromasts and the un-targeted anterior segment of the pLL nerve intact  
18 and uninjured (Figure 2B'''). Intriguingly, 5 days post injury there were no signs of nerve cone  
19 regrowth suggesting a deficiency in the regenerative potential and axonal guidance in the peripheral  
20 nervous system of medaka (Figure 2C). Despite the irrevocable loss of the pLL nerve neither organ  
21 numbers nor positioning were affected when fish with ablated pLL nerves were analysed at later  
22 stages of embryonic development (Figure 2C, C' n=11 embryos). These larvae displayed the  
23 characteristic alternated pattern between primary ventral and secondary midline neuromasts. Our  
24 results indicate that the pLL nerve is dispensable for correct patterning in the pLL of medaka.

25 Our results are striking since it has been extensively reported in zebrafish that loss of the pLL nerve  
26 leads to supernumerary organ formation in the lateral line (Grant et al., 2005; López-Schier and  
27 Hudspeth, 2005; Lush and Piotrowski, 2014; Whitfield, 2005). This is primarily due to the fact that  
28 associated glial cells are not able to migrate in the absence of the pLL nerve (Gilmour et al., 2002)  
29 and are thus incapable of maintaining neuromast organ numbers in check (Grant et al., 2005; López-  
30 Schier and Hudspeth, 2005; Lush and Piotrowski, 2014; Whitfield, 2005). To test whether glial cells  
31 in medaka can migrate independently of the nerve and hence rescue the possible patterning and  
32 organ number defects we generated a *Sox10:mCherry* transgenic line that labels glial cells (Lush  
33 and Piotrowski, 2014). We used double positive (*Eya1:mCFP*)(*Sox10:mcherry*) embryos to label  
34 both the pLL nerve for the ablation and the glial cells for the response after injury (Figure 2 D-E').

1 As has been reported in zebrafish glial cells do not over-take the pLL nerve (Gilmour et al., 2002)  
2 and were only present on intact uninjured segments of it (N=4 embryos) (Figure 2 E-E'). These  
3 results strongly argue that the pLL pattern and organ numbers are properly established even in the  
4 absence of sox10+ glial cells and the pLL nerve in medaka.

## 5 **Uncoordinated neuromast patterning in *Da*, ventral-mirrored embryos**

6 Primary neuromast positioning in medaka could either be a result of an active migration or a passive  
7 displacement ventrally after deposition. To distinguish these possibilities, we made use of the  
8 *Double anal (Da)* medaka mutant, which has a partial duplication of the ventral side along the tail  
9 due to the inactivation of *zic* genes (Moriyama et al., 2012; Ohtsuka et al., 2004) (Figure 3A-B). This  
10 is particularly interesting as it meant we could modulate the immediate environment the primordium  
11 travels through without changing any intrinsic properties of the primordium itself. If primary organs  
12 are passively displaced ventrally then we would expect a randomization of their positions in the *Da*  
13 mutant; either to the induced ventralized side or the regular ventral side. However, what we  
14 observed is that in 80% of all larvae one or more primary organs is positioned at the midline (Figure  
15 3C-D N>50 embryos). This argues against a passive displacement of primary organs and suggests  
16 active migration (for e.g in response to a duplicated chemokine signal emanating from the ventral  
17 side) could be responsible for organ positioning. It is possible that primary organ positioning is  
18 resolved coordinately on a system level, alternatively organ positioning could be resolved  
19 autonomously by each organ (neighbor-independent movement). To distinguish whether the pLL  
20 pattern is built on a system level control or by autonomous units that undergo the same  
21 morphogenetic movements we decided to perform long term live-imaging on *Da* mutants during  
22 pLL pattern construction. This revealed that primary precursor organs are autonomous in the  
23 direction of their movement even within the same pLL and that the pLL nerve connection follows  
24 the migratory path of the forming organs irrespective of their migratory direction (Figure 3E-E')  
25 (Supplementary Movie 1, N=5 embryos). In addition, organs that remain at the midline commonly  
26 changed their positions multiple times (above and below the horizontal myoseptum) before  
27 eventually settling at the midline (Supplementary Movie 1, 2 N = 5 embryos). Our results show that  
28 pattern construction in the pLL of medaka is highly dependent on local interactions that are resolved  
29 individually by the primary precursor organs depending on their immediate environment.

30 Interestingly, in all cases observed in the *Da* mutant, a secondary organ was formed in between  
31 two primaries regardless of their position (ventral-ventral, ventral-dorsal, dorsal-dorsal and dorsal-  
32 ventral) (N= 5 embryos) (Supplementary Movie 1). These results point to the fact that intrinsic  
33 properties of the primordium (one secondary organ in between two primaries, secondary organ  
34 positioning) and extrinsic properties (positioning of primary organs) together govern the

1 construction of the pLL pattern in medaka. Also, they highlight the plasticity of this neural system  
2 to respond differentially to local changes in its environment on an organ-by-organ level creating a  
3 novel pLL pattern in the process.

#### 4 ***K15* mutants show a perturbed epithelium and pLL patterning defects**

5 Intrigued by the possibility that modulating the immediate environment of the primordium might  
6 lead to a modulation of pLL patterns, we decided to disrupt epithelial integrity by targeting *keratin*  
7 *15* (*krt15*) using Crispr/Cas9 (see M&M). Both F0 crispants and stable mutants (Supplementary  
8 Figure 1) showed epithelial extrusion (Figure 4A,B white arrows), perturbations in the structural  
9 integrity and cellular packing in the supra-basal epithelial layer (Figure 4 C-D, N=>100 cells  
10 segmented in *wt* and *krt15* mutants, N= 5 control & 15 *krt15* mutants larvae), lesions in the basal  
11 epithelium (Figure 4 F-G' N>10 embryos) and epithelial cell death (Figure 4 G-G' magenta arrows  
12 N=5 embryos) as revealed by nuclear rounding and cell membrane shrinkage, all in line with known  
13 Krt15 functions in epithelial cells (Bose et al., 2013; Chamcheu et al., 2011; Giroux et al., 2017;  
14 Giroux et al., 2018; Haines and Lane, 2012; Liu et al., 2003; Peters et al., 2001). In addition, *krt15*  
15 crispants and mutants showed a perturbed lateral line pattern, with primary organs locating to the  
16 midline (Figure 4 E-G'). While primary and secondary organs are arranged in an alternating pattern  
17 in *wild types* (N=24/24 pLLs), we have observed primary organs retained in the midline of *krt15*  
18 homozygous mutants (N=25/26 *krt15* pLLs)(see M&M).

19 By tracing the positioning of the nerve connections in *krt15* mutants it seemed plausible that primary  
20 organs are initially specified correctly and move ventrally but at a later point revert their position  
21 and locate to the midline. To test this hypothesis directly and to reveal the basis for the pLL  
22 phenotype in *krt15* mutants we decided to rely on a 4D-live imaging approach. This revealed that  
23 primordium migration is significantly slower and stuttered in *krt15* mutants as compared to *wt* and  
24 *Da* mutants (4,71 +/- 2,38  $\mu\text{m}/\text{h}$  in *krt15* mutants, N = 3 embryos, 17,95 +/- 3,69  $\mu\text{m}/\text{h}$  in *wild types*,  
25 N = 5 embryos and 18,28 +/- 4,71  $\mu\text{m}/\text{h}$  in *Da* mutants, N = 5 embryos) (Supplementary Movies 3 &  
26 4, N = 3 *krt15* mutant fish and 3 *wt* fish), coinciding with the presence of epithelial lesions that block  
27 the path of the primordium through the epithelium. Our live-imaging also revealed that a fraction of  
28 primary deposited organs starts moving ventrally but are heavily delayed or blocked from  
29 proceeding further, in some cases even reverting their direction to migrate towards the mid-line  
30 (Supplementary Figure 2). These results are in line with our nerve tracing experiments that show a  
31 reversion of the nerve connection from ventral to dorsal directions in *krt15* mutant embryos  
32 (Supplementary Figure 2). Intriguingly, one secondary organ forms in between two primary organs  
33 in all the *krt15* mutants, and these secondary neuromasts locate properly to the midline, strongly  
34 suggesting that both properties are indeed intrinsic features of the pLL system itself. While we have



1 previously reported that neuromast numbers are variable between left and right pLLs within the  
2 same *wt* fish (Seleit et al., 2017a), both sides have an identical, alternating distribution between  
3 ventral primaries and midline secondaries. Interestingly, we have seen cases in which the  
4 distribution of neuromasts were different between left and right pLLs within *Da* or *krt15* mutant  
5 embryos (5/7 and 5/13 embryos, respectively), typically showing one side with more mislocated  
6 primary organs than the other. Both the asymmetries in organ distribution between left and right  
7 pLLs within a fish, and the fact that some but not all primary organs are mislocated along a given  
8 pLL, highlight the degree of phenotypic plasticity in the system and suggest once more that subtle  
9 local differences in immediate micro-environment can have a large impact on resulting patterns.

## 10 **Epithelial cell integrity modulates pLL pattern in medaka**

11 A double *in situ* hybridisation using specific anti-sense probes for *eya1* and *krt15* showed that *krt15*  
12 mRNA is not detectable in the primordium tissue during migration (Figure 5A-B'' N=3), indicating  
13 that the pLL patterning defect observed in the *krt15* mutant might indeed be extrinsic to the  
14 primordium. To directly test whether the patterning defects in the *krt15* mutant arise intrinsically  
15 due to defects in the primordial tissue or extrinsically from the local environment the primordium  
16 travels through, we decided to perform blastula stage transplantation assays from *krt15* mutants  
17 into *wt* and vice-versa, since we have previously shown that the neuromasts and the surrounding  
18 epithelium have two independent embryonic origins (Seleit et al., 2017b). Our results show that the  
19 presence of a large majority of *krt15* mutant cells within a primary neuromast does not lead to any  
20 patterning defects (Figure 6A-B'' N=6 chimeric embryos n=12 mosaic organs), since neuromasts  
21 correctly position to the ventral side and the pLL pattern observed is equivalent to the wild-type.  
22 On the other hand, the presence of a vast majority of wild type cells in the neuromast in a *krt15*  
23 mutant background fails to rescue the patterning defect (Figure 6C-D, N= 3 chimeric fish and n=6  
24 mosaic organs). Along the same lines, we obtained one transplanted fish in which *wild type* cells  
25 contributed to the epithelium of the right side of the tail in an otherwise *krt15* mutant background.  
26 In that larva, the left pLL displayed the typical aberrant organ distribution reported for *krt15*, with  
27 most neuromasts located along the midline (Figure 6E-E''). On the right side, however, the presence  
28 of a *wild type* epithelium rescued the alternating distribution of neuromasts, where primary organs  
29 locate ventrally and secondary neuromasts locate at the middle (Figure 6F-F''). These data  
30 combined with previous results strongly argue that the observed pLL patterning defect arises from  
31 the local environment the primordium and primary deposited organs travel through, namely the  
32 epithelium.

33 Complementing the *krt15* genetic perturbation, we decided to mechanically interfere with epithelial  
34 cell integrity, to address whether the disruption of epithelial integrity was the driving force behind



1 the aberrant neuromast distribution in *krt15* mutants. Using 2-photon laser ablation we targeted  
2 *krt15* positive epithelial cells directly below deposited primary organs during primordium migration  
3 in 3-4 dpf *Krt15:mYFP* embryos (Figure 7A), leaving both the primordium and deposited organs  
4 uninjured and intact. Iterative imaging 48 hours post ablation revealed that mechanically induced  
5 lesions interfered locally with correct ventral migration of primary organs, and therefore  
6 recapitulated our results from the *krt15* mutant (Figure 7B-C' N=5 ablated embryos and N=3 non-  
7 ablated controls). Notably, neuromasts anterior and posterior to the injury site, not exposed to a  
8 mechanical perturbation in their immediate surrounding, positioned correctly along the body axis  
9 (Figure 7C). Overall, our results indicate that the pLL pattern is easily modulated by changes in  
10 tissues external to the primordium (*i.e* the epithelium), suggesting that this adaptability can be  
11 exploited evolutionarily to match a somatotopic sensory system to variable body shapes.

# 1 Discussion

2 How biological patterns are built and how they evolve is a central question in developmental  
3 biology. Recent work has argued for cis-regulatory element refurbishment as a means for  
4 evolutionary tinkering (Chan et al., 2010; Indjeian et al., 2016; Jones et al., 2012; McLean et al.,  
5 2011; O'Brown et al., 2015; Prud'homme et al., 2006). Yet it is still unclear how reproducibility within  
6 one species is balanced with the requirements of evolution of forms and patterns between species.  
7 In this work we show that for a peripheral nervous system in vertebrates, the strategy relies on  
8 balancing the strict internal properties of the system with a plastic response to the immediate  
9 microenvironment executed autonomously on an organ-by-organ basis. The self-organizing and  
10 hierarchical nature of the process ensures that small changes in conditions can lead to large  
11 variations in patterns without affecting organ morphogenesis. Our data support the hypothesis that  
12 these changes do not need to occur within the pLL founding tissue *per se* and do not need to  
13 involve any regulatory changes within the genetic landscape controlling primordium migration. The  
14 unpredictability of individual organ positioning in *Da* and *krt15* mutants points towards the fact that  
15 the posterior lateral line system is phenotypically plastic. This low developmental buffering capacity  
16 (Waddington, 1959; Waddington, 1968, 1969) for the pLL would ensure it is able to evolve rapidly  
17 in response to changes in other tissues or overall morphology of teleost fish. That these changes  
18 happen during embryogenesis emphasises the already well-established paradigm of development  
19 as the playing field of evolution (Carroll, 2005). Our results are surprising since they show that a  
20 new pattern can be obtained without changing any internal or genetic properties of the cells  
21 executing organogenesis. Instead, the system has the capacity to sense, react and respond to  
22 changes in its surroundings in an organ autonomous manner. By probing differential organ  
23 positioning the pLL system is well suited for a rapid evolutionary diversification; indeed, by looking  
24 at different embryonic pLL patterns in a number of species we were able to see evidence of this  
25 plasticity at play (Figure 8).

26

27 The main function of the lateral line in teleost fish is to sense the direction of water flow and relay  
28 this information back to the brain (Ghysen and Dambly-Chaudière, 2007). Critical to the fulfillment  
29 of this function is proper, species-specific numbers and distribution of neuromasts. Previous work  
30 in zebrafish reported that a fixed number of organs is deposited by the primordium (Ghysen et al.,  
31 2010; Gompel et al., 2001; Sarrazin et al., 2010) but that the number of subsequent, inter-calary  
32 organs relies on external cues (Ghysen et al., 2010; Nuñez et al., 2009; Sapède et al., 2002).  
33 Specifically, it has been shown that the loss of the pLL nerve and associated glia in a variety of  
34 mutants leads to supernumerary neuromasts (Grant et al., 2005; López-Schier and Hudspeth, 2005;

1 Lush and Piotrowski, 2014; Whitfield, 2005), the source of which is an over-proliferation of latent  
2 inter-neuromast cells (Grant et al., 2005; Lush and Piotrowski, 2014)). While there is an obvious  
3 effect on organ numbers, the positioning of these extra organs in zebrafish remain largely equivalent  
4 to the wild-type, where all neuromasts are arranged along the horizontal myoseptum at the end of  
5 embryogenesis (Grant et al., 2005; López-Schier and Hudspeth, 2005). Recent work has shown  
6 that *ErbB* signaling emanating from glial cells contributes to maintaining organ numbers in check  
7 (Lush and Piotrowski, 2014). Our results in medaka challenge the generality of these findings in  
8 other teleosts. First, we clearly show that the pLL nerve is dispensable for proper organ numbers  
9 and positioning. Second, we show that a normal pLL pattern and organ numbers are maintained in  
10 the absence of *Sox10*+ associated glia. It is therefore plausible that different mechanisms exist that  
11 control pLL pattern and organ numbers in different teleosts. However, we and others have reported  
12 that *ngn1* mutants and crispants show an increase in organ numbers in the pLL of both medaka  
13 and zebrafish (López-Schier and Hudspeth, 2005; Seleit et al., 2017b). Since *ngn1* acts  
14 developmentally earlier during placodal specification (Andermann et al., 2002; López-Schier and  
15 Hudspeth, 2005) these defects might therefore not solely pertain to the presence or absence of glial  
16 cells. We have previously reported that the posterior lateral line primordium present in medaka  
17 resembles zebrafish *PrimII* in terms of the overall pattern generated (Nuñez et al., 2009; Seleit et al.,  
18 2017a). Intriguingly none of the previously described mutants leading to supernumerary neuromast  
19 numbers in zebrafish were reported to have an effect on *PrimII* derived neuromasts (Grant et al.,  
20 2005; López-Schier and Hudspeth, 2005). This raises the possibility that neither *PrimII* in zebrafish  
21 nor the medaka pLL primordium are affected by loss of the pLL nerve or associated glia. Related  
22 to the nerve ablation experiments, two additional observations are worth discussing. First, it has  
23 been reported previously in zebrafish that peripheral nerves act instructively during post-embryonic  
24 neuromast formation (Wada et al., 2013a), since organs will not form without a preceding nerve  
25 outgrowth. In the embryonic pLL development in medaka, however, the nerve is entirely  
26 dispensable for organ formation, organ numbers and patterns, highlighting that even within similar  
27 systems, the hierarchical logic governing the sequence of events required for their construction can  
28 be markedly different. And secondly, an unexpected outcome of the nerve ablation experiments is  
29 the observation that medaka pLL nerve is not able to re-grow after injury, a situation that differs  
30 from what is reported in zebrafish (Gilmour et al., 2002). This deficiency in regenerative potential in  
31 medaka has been reported for a number of other organs (Ito et al., 2014; Lai et al., 2017; Lust and  
32 Wittbrodt, 2018) and the peripheral nervous system can now be added to the growing list of  
33 regeneration-deficient components. The molecular underpinnings of this fundamental difference in  
34 regenerative capacities between different teleosts is only beginning to be explored (Lai et al., 2017;  
35 Lust and Wittbrodt, 2018).

1 A kaleidoscopic diversity of body plans exists in teleost fish (Coombs et al., 2014; Coombs et al.,  
2 1988). This raises immediate problems for the set-up of a peripheral nervous system component  
3 like the neuromasts of the lateral line during development (Ghysen and Dambly-Chaudiere, 2016).  
4 On the one hand the system must be tunable and easily adjustable to fit the diverse body plans of  
5 the different species, and on the other it must still be reproducible within and between members of  
6 the same species. We show that the system accommodates these needs by balancing fixed  
7 intrinsic properties (reproducibility) with an ease of response to small changes in extrinsic cues  
8 (adaptability). In medaka, neuromasts invariably alternate between the midline and the ventral line  
9 irrespective of the total number of organs that the posterior lateral line harbours (Seleit et al., 2017a).  
10 By challenging the medaka lateral system to different contexts we were able to gain new insights  
11 into the operational logic behind pLL pattern construction. This was done by using a medaka mutant  
12 with an unconventional body plan, a mutant with a disturbed epithelial integrity, in addition to local  
13 mechanical perturbations to epithelial cells. And interestingly, we observe that even within the same  
14 *Da* or *krt15* genotype organ numbers and distribution can be decoupled between left and right pLLs  
15 of the same fish. This strongly suggests that local interactions and other non-genetic causes might  
16 contribute to the phenotypic plasticity of this developmental morphogenetic process. The *Da*  
17 mutant challenges the system by the presence of two ventral sides on the tail, revealing the  
18 autonomous nature of organ positioning, *i.e.* primary neuromasts locate to the ventral, dorsal  
19 (induced ventral) or midline independently of one another. Organ positioning is therefore resolved  
20 in a neuromast neighbor-independent manner arguing against the presence of a system level  
21 control on the process. Our results point to a high potential of plasticity in the system but within  
22 defined and strict boundaries ensuring a reproducible outcome. Specifically, it seems the system  
23 balances intrinsic fixed properties with extrinsic malleability and adjustability. We report that the  
24 generation of a single secondary organ in between two primaries seems to be an intrinsic property  
25 of the medaka pLL primordium, observed in the *Da* mutant, the *krt15* mutant and in the ablation of  
26 the posterior lateral line nerve. Extrinsicly, the immediate environment the primordium and primary  
27 deposited organs travel through directly influences the final position of the organs and therefore the  
28 overall pLL pattern at the end of embryogenesis. A sequential order emanates from this logic, where  
29 first, local extrinsic parameters modulate primary organ positioning, second, neuromast migration  
30 dictates the innervation and therefore neuronal network (Haas and Gilmour, 2006) and third, the  
31 final position of the organ induces in situ the formation of a life-long niche for neuromast stem cells  
32 during organ maturation (Seleit et al., 2017b). The same hierarchical organisation is well reported in  
33 different induction paradigms, like the induction of the lens by the neural retina in vertebrates (Cvekl  
34 and Ashery-Padan, 2014) or the generation of a new neural plate by the Henses' node in chicken  
35 (Storey et al., 1992) (Anderson and Stern, 2016).

36

1 We have previously reported that *krt15* is expressed in the basal (dividing) epithelial cell layer of  
2 medaka in addition to the long-term stem cells within mature neuromasts (Seleit et al., 2017b), in  
3 line with its known role as an epithelial stem cell marker in a variety of tissues (Bose et al., 2013;  
4 Giroux et al., 2017; Giroux et al., 2018; Liu et al., 2003). Our newly generated *krt15* mutant shows  
5 epithelial lesions and the loss of epithelial cell integrity in addition to epithelial cell death and  
6 extrusion, phenotypes consistent with its functional roles in the epithelium of other model organisms  
7 (Chamcheu et al., 2011; Haines and Lane, 2012; Peters et al., 2001). Interestingly we also report a  
8 strong phenotype in the pLL pattern of medaka and by transplantation assays and mechanical  
9 disruption of the skin we trace its origin to the perturbed mutant epithelium. Recent results in  
10 zebrafish revealed that the epithelium is necessary for the migration of the primordium, since skin  
11 removal results in halting primordium migration, which will resume only after re-growth of the  
12 epithelial cells (Nogare et al., 2019). Consistent with this, we observe phenotypes in primordium  
13 migration, *i.e.* stuttering, in the medaka *krt15* mutants in response to epithelial cell lesions. In  
14 addition to this our results strongly suggest that the degree of structural integrity of the tissue the  
15 primordium and deposited primary organs travel through can directly modulate pLL patterns.

16

17 The results we report along the manuscript suggest that pLL pattern construction is a system with  
18 a low developmental buffering capacity. The concept of developmental buffering was first  
19 described by Conrad Waddington to explain the canalization of developmental processes *i.e.* the  
20 arrival at the same reproducible outcome despite small genetic and non-genetic differences in  
21 starting conditions (Waddington, 1941, 1959; Waddington, 1968, 1969). However, Waddington also  
22 recognised that different developmental modules must have different buffering capacities  
23 depending on need (Waddington, 1959). In the case of the pLL it would be evolutionarily beneficial  
24 to operate under a low developmental buffering capacity as it would make the system highly  
25 susceptible to small changes in conditions. It is tempting to speculate that the high plasticity of the  
26 system could be exploited evolutionarily to generate diverse patterns of lateral lines in the wild.  
27 Combining examples from the literature and our own cross-species observations confirms that  
28 embryonic pLL patterns are variable among different teleost species (Figure 8), highlighting once  
29 more the degree of plasticity and fast evolvability of this developmental module.

30

## 1 **Competing interests**

2

3

4 The authors declare no competing interests.

# 1 **Acknowledgements**

2

3 We would like to thank Steffen Lemke, and the entire Centanin and Lemke lab members for critical  
4 input on the manuscript and for fruitful discussions. We would like to thank Jochen Wittbrodt for  
5 the generous support and access to equipment, Hiro Takeda for *Da* mutants, Tatjana Piotrowski for  
6 the *Sox10* promoter, Manfred Scharl for providing fixed samples of a number of teleost species  
7 used in this study, NBRP Medaka for materials and E. Leist, A. Sarraceno and M. Majewski for  
8 assistance regarding fish maintenance. This work has been funded by the Deutsche  
9 Forschungsgemeinschaft (German Research Foundation, DFG) via the Collaborative Research  
10 Centre SFB873.



# 1 Figure Legends

2

## 3 **Figure 1. The formation of the posterior lateral line (pLL) system in medaka.**

4 A primordium (green, upper panel) detaches from the pLL placode and migrates posteriorly, with the  
5 pLL following its path (cyan, the second panel, right). *Eya1* is expressed in the primordium, the  
6 deposited neuromasts and also by neurons in the ganglia. Primary neuromasts (PN) are deposited at  
7 roughly regular intervals in the midline, and move ventrally immediately after deposition (upper and  
8 second panels). When in the ventral domain, secondary neuromasts (SN) form between each pair of  
9 primary neuromasts, and these SN migrate dorsally reaching the midline to form a characteristic zig-  
10 zag pattern (third and fourth schemes, left, and third panel, right). By the end of embryogenesis, the  
11 pLL is composed of two parallel lines: a ventral pLL formed by primary neuromasts, and a midline  
12 pLL formed by secondary neuromasts. Scale bar = 50 microns. Anterior is to the left and dorsal is up  
13 in all panels.

## 14 **Figure 2. Correct organ number and positions in pLL of medaka despite loss of pLL nerve**

15 **(A-A')** Control 9 dpf *Tg(Eya1:mCFP)(K15:H2B-RFP)* embryo displays alternating neuromasts in the  
16 pLL. The pLL nerve is labelled by *Eya1:mCFP* along the trunk and is connected to the mature primary  
17 ventral organs and midline secondary organs that are both labelled by *K15:H2B-RFP*. **(B)** 3-4 dpf  
18 *Tg(Eya1:mCFP)* medaka embryo highlighting the primordium, the pLL nerve and deposited primary  
19 neuromast organs along the horizontal myoseptum. **(B')** 3-4 dpf *Tg(Eya1:mCFP)* medaka embryo  
20 before multi-photon laser ablation, primordium is migrating and a few organs have been deposited.  
21 **(B'')** 3-4 dpf *Tg(Eya1:mCFP)* medaka embryo after multi-photon ablation, segment of the pLL is nerve  
22 ablated while neuromasts and primordium remain intact and un-injured. **(C)** Pattern and number of  
23 neuromasts are normal despite loss of pLL nerve in *Tg(Eya1:mCFP) (K15:H2B-RFP)* 9 dpf. (N = 11  
24 embryos). White asterisk indicates ablation site. **(C')** Scheme of neuromast position and number upon  
25 ablation of the pLL. **(D-D')** Double transgenic *(Eya1:mCFP)(Sox10:mCherry)* 9 dpf embryo shows glial  
26 cells (red) wrapping around pLL nerve (magenta). **(E-E')** Ablated pLL nerve in  
27 *Tg(Eya1:mCFP)(Sox10:mcherry)*. Note that the Cherry positive glial cells do not over-take the ablated  
28 pLL nerve (white asterisk indicates ablation site) and are only present where the nerve is intact (N=4  
29 embryos). Scale bar = 100 microns.

30

1 **Figure 3. Location of primary neuromasts in *Da* mutants reveal autonomous organ positioning**  
2 **in the pLL system.**

3 (A) Scheme representing main differences in body shapes between adult *wt* and *Da* mutant fish.  
4 Notice the duplication of the anal fin dorsally in the *Da* mutant. (B) Bright-field view of *wt* and *Da*  
5 medaka larvae showing dorsal and anal fin positions. Scale bar = 100 microns. (C) Tg(*Eya1*:GFP) *Da*  
6 mutant shows neuromasts locating to both ventral and duplicated ventral side (green and yellow  
7 asterisks, respectively) while many neuromasts remain stuck in the midline (magenta asterisks). Scale  
8 bar = 100 microns. (D) A Tg(*krt15*:H2B-RFP) *Da* mutant shows additional organs locating to the midline  
9 (magenta asterisks). Scale bar = 100 microns. C & D panels, N > 50 *Da* larvae. (E-E') Snapshots of  
10 a 4D-live SPIM imaging on 4 dpf Tg(*Eya1*:GFP) *Da* mutant during pLL organ deposition. Notice primary  
11 organs moving to the induced ventral side (yellow label), the regular ventral side (green label) and an  
12 organ that remains stuck in the midline (magenta label). Scale bar = 50 microns. Time in hours. N=5  
13 larvae.

14 **Figure 4. *Krt15*<sup>-/-</sup> mutants show epithelial and pLL patterning defects.**

15 (A) Bright-field imaging of *wt* stage 42 larvae, notice normal epithelium. (B) Bright-field imaging on  
16 *krt15* mutant stage 42 larvae, notice the presence of extruding cells from the epithelial cell layer  
17 (white arrows) (C) Manual segmentation of *wt* suprabasal epithelial layer in 9 dpf embryos, notice the  
18 regular packing and conserved shape of epithelial cells. (D) Manual segmentation of *krt15* mutant  
19 suprabasal epithelial layer reveals massive disorganization, loss of structural packing and loss of  
20 uniform cell size N >100 cells segmented in *wt* and *krt15* mutants, N= 5 control & 15 *krt15* mutant  
21 larvae. (E) Control Cas9 injected Tg(*K15*:LifeAct-tRFP) with alternating pLL pattern. (F, F') Double  
22 Tg(*K15*:LifeAct-tRFP)(*Eya1*:EGFP) crisprant injected with Cas9 + gRNA1,2 against *krt15* locus. (F)  
23 Notice epithelial disorganization and lesions, disturbed pLL patterns with many organs in a row at the  
24 midline. (F') Same larvae showing *Eya1*:EGFP, whole expression is in blue and neuromasts are  
25 displayed in green to highlight pLL patterning defects. N>100 injected embryos, 40% showing a  
26 phenotype in pLL patterning and skin lesions. (G-G') Double Tg(*K15*:H2B-GFP)(*K15*:LifeAct-tRFP)  
27 *krt15* mutant recapitulates phenotypes observed in the injected (F0) generation. Notice the presence  
28 of epithelial lesions (F, magenta arrows) and the heavily perturbed pLL pattern (F') where many  
29 primary neuromasts are located at the midline. Scale bar = 100 microns.

30 **Figure 5. Perturbed *krt15* mutant epithelium causes pLL patterning defect.**

31 (A) Double *in situ* hybridization using *eya1* and *krt15* antisense probes during the primordium migration  
32 stage. *eya1* is strongly expressed in the primordium while *krt15* is mainly in the epithelium with no  
33 detectable expression in the primordium. Scale Bar = 100 microns (B-B'') 3D reconstruction on the

1 primordium of a sample treated as in (A). 0°, 90°, and 180° rotations to show differential expression of  
2 *eya1* in the primordium and *krt15* in the epithelium. Scale bar = 20 microns.

3 **Figure 6. Perturbed *krt15* mutant epithelium causes pLL patterning defect.**

4 (A-B'') Anti-EGFP antibody staining on chimeric larvae where Tg(*Eya1*:GFP) *krt15* mutant cells were  
5 transplanted into unlabelled *wild-type* background. (A) Organs with majority of *krt15* mutant cells  
6 position correctly to the ventral side. N = 6 transplanted embryos, N=12 mosaic organs. Scale bar =  
7 100 microns. (B-B'') Close up on ventral mosaic organs showing majority of *krt15* mutant cells. Scale  
8 bar = 20 microns. (C-D) In vivo imaging of chimeric larvae where Gaudi<sub>i-loxP/OUT</sub> donor cells (ubiquitously  
9 expressing H2B-EGFP) were transplanted into unlabelled *krt15* mutants. Organs containing mostly  
10 *wild type* cells remain at the midline. N = 3 transplanted fish and n = 6 neuromasts. Scale bar = 20  
11 microns. (E-F'') A chimeric *krt15* mutant larvae that displays wild type cells along the right trunk  
12 rescues the alternating distribution of neuromasts. EGFP expression in Tg(*Eya1*:EGFP) is displayed  
13 in blue (E, F), while EGFP positive neuromasts are represented in green (a subgroup of EGFP positive  
14 cells)(E', E'', F', F''). (F'') The *krt15* mutant side shows the aberrant neuromast location. (F'') *krt15*  
15 mutant neuromasts arrange in an alternating manner when surrounded by wild type epithelial cells  
16 (red). Scale bar in E'', F'' = 1 mm.

17 **Figure 7. Local mechanical perturbation of epithelium leads to pLL patterning defects.**

18 (A) Schematic diagram of 2-photon ablation on Tg(*K15*:mYFP), 3dpf (left). Tg(*K15*:mYFP) embryos  
19 showing primordium migration and primary deposited organs before (upper right) and immediately  
20 after (bottom right) 2-photon laser ablation of epithelial cells below primary deposited organs. (B) 5  
21 dpf control, unablated Tg(*K15*:mYFP) showing alternating neuromast pattern with primary organs  
22 locating ventrally. (C) 48 hours post epithelial cell ablation, two primary organs fail to migrate ventrally  
23 at the site of injury, while organs anterior and posterior to the injury site locate normally. (C') Close up  
24 view of primary organs that failed to migrate ventrally in (C). N=3 Ablated fish and 3 controls. Scale  
25 bar = 100 microns.

26 **Figure 8. Diversity of embryonic pLL pattern and organ number in different teleosts**

27 The diversity of pLL patterns at the end of embryogenesis in a variety of teleosts. Scheme showing the  
28 distribution and approximated organ numbers in a variety of teleost fish that were stained using either  
29 DAPI or DiAsp and imaged. N = 4 for each species, but zebrafish and medaka N > 20. Fish embryos  
30 are not drawn to scale.

# 1 **Supplementary Figure Legends**

2

## 3 **Supplementary Figure 1**

4 We have targeted the medaka *krt15* locus (top) with two different gRNAs (red triangles). Among the  
5 mutant alleles obtained, we isolated and grew stable mutant lines for the following alleles that are  
6 displayed in the figure: *krt15*<sup>D594</sup>, *krt15*<sup>D435D6</sup>, *krt15*<sup>D4D6</sup>. Major deletions are represented by a shadow  
7 box (*krt15*<sup>D594</sup>, *krt15*<sup>D435D6</sup>), while for minor deletions of 4 - 6 bp (sgRNA2 site for *krt15*<sup>D435D6</sup>, and both  
8 gRNA sites for *krt15*<sup>D4D6</sup>) we present the DNA sequence in the altered region (bottom).

9

## 10 **Supplementary Figure 2**

11 (A-A') Stacks from time-lapse confocal imaging of Tg(*Eya1*:mCFP) *krt15* mutant during primary  
12 organ ventral displacement. Notice that in cases, primary neuromasts start ventral displacement  
13 (yellow dot, A) as in the wild type, but revert later to the midline (yellow dot, A'). N= 6 fish. Time in  
14 hours. Scale bar=50 microns. (B-D) Confocal image of Tg(*Eya1*:mCFP)(*K15*:LifeAct-tRFP) *krt15*  
15 mutant larvae. Primary organs are located in the midline, and their nerve path reveals a prior ventral  
16 displacement.

# 1 **Supplementary Movie Legends**

## 2 **Supplementary Movie 1. Uncoordinated primary neuromast migration in *Da* mutants.**

3 Time-lapse SPIM imaging of 3 dpf Tg(*Eya1*:GFP) *Da* mutant during primordium migration reveals that  
4 primary organs resolve positioning as autonomous units. Notice that the pLL nerve will migrate  
5 together with the neuromasts regardless of migration direction. A secondary organ will form between  
6 2 primary organs irrespective of their migratory direction. Scale bar= 30 microns. Time in hours.

7

## 8 **Supplementary Movie 2. Primary organ movement in *Da* mutant**

9 Time-lapse SPIM imaging of 3-4 dpf Tg(*Eya1*:GFP) *Da* mutant during primary organ deposition.  
10 Zoom-in on primary organ movement: notice the change of position relative to the horizontal  
11 myoseptum, initially the organ moves ventrally, subsequently it moves in the dorsal direction before  
12 eventually moving back towards the horizontal myoseptum where it will locate. Scale bar= 30  
13 microns. Time in hours.

14

## 15 **Supplementary Movie 3. Primordium stalling and primary organ positioning defects in *krt15*** 16 **mutant embryo**

17 Time-lapse confocal imaging of 3 dpf Tg(*Eya1*:mCFP) *krt15* mutant during primordium migration.  
18 Notice that the primordium stalls and stops migration before resuming its movement. In addition,  
19 primary organs start ventral displacement in the mutant as revealed by the pLL nerve connection,  
20 however their normal ventral movement is heavily perturbed. N=3 *krt15* mutants.

21

## 22 **Supplementary Movie 4. Primordium stalling and epithelial lesions in *krt15* mutant embryo**

23 Time-lapse SPIM imaging of 3 dpf Tg(*Eya1*:EGFP)(*K15*:H2B-EGFP) (k15-LifeAct-tRFP) *krt15* mutant  
24 during primordium migration. Notice that the primordium momentarily halts migration before  
25 resuming its movement. The nuclear and cellular membrane labelling in the epithelium helps  
26 visualising lesions in the skin and apoptotic nuclei forming around primary organs. N=2 *krt15* mutants.

1

## 2 **Materials and Methods**

### 3 **Animal ethics and strains used**

4 Medaka were maintained as closed stocks at the Centre of Organismal Studies of the University of  
5 Heidelberg (Tierschutzgesetz §11, Abs. 1, Nr. 1). Medaka and zebrafish husbandry and experiments  
6 were performed according to local animal welfare standards (Tierschutzgesetz 111, Abs. 1, Nr. 1,  
7 Haltungserlaubnis) and in accordance with European Union animal welfare guidelines. The fish  
8 facility is under the supervision of the local representative of the animal welfare agency. The fish  
9 colony was maintained under standard recirculating aquaculture conditions, 14 hours of light and 10  
10 hours of darkness. The strains used in this study are: *Cab* (wild-type population), *Da* mutant  
11 (Ohtsuka et al., 2004).

12

### 13 **Transgenic lines**

14 We have used the following transgenic lines: Tg(*Eya1*:mECFP), Tg(*Eya1*:EGFP), Tg(*K15*:H2B-  
15 EGFP), Tg(*K15*:H2B-RFP) (Seleit et al., 2017a; Seleit et al., 2017b), *Gaudi*<sup>loxPOUT</sup> (Centanin et al.,  
16 2014). The newly generated transgenic lines are:

17 Tg(*Sox10*:mCherry): The plasmid *sox10*:mCherry (a gift from Thomas Look, Addgene plasmid #  
18 98695) was injected in wild type or *Da*<sup>-/-</sup> medaka embryos at the one cell stage using I-SceI  
19 meganuclease protocols as previously described (Thermes et al., 2002).

20 Tg(*K15*:LifeAct-tRFP): A LifeAct-tRFP peptide was clone under the previously published medaka  
21 *krt15* partial promoter (Seleit et al., 2017b) using Age1 and Not1 restriction enzymes. The resulting  
22 plasmid *K15*:LifeAct-tRFP was injected in medaka embryos at the one cell stage.

23

### 24 **Generation of *keratin 15* mutants**

25 Two gRNAs targeting exons 2 and 5 of the *keratin 15* were designed using CCTop (Stemmer et al.,  
26 2015) and synthesised as previously described (Stemmer et al., 2015). The sequences of *krt15*  
27 gRNAs are UGACCGGCUUGCCAGCUACCUGG and CACUGGUCAGGUCAACGUUGAGG. The  
28 following oligos were used:

1 *sgRNA-1\_F*: TAGGTGACCGGCTTGCCAGCTACC

2 *sgRNA1\_R*: AAACGGTAGCTGGCAAGCCGGTCA

3 *sgRNA-2\_F*: TAGGCACTGGTCAGGTCAACGTTG

4 *sgRNA-2\_R*: AAACCAACGTTGACCTGACCAGTG

5 Annealed oligos were ligated into linearised DR274 plasmids (Addgene clone number: #42250) as  
6 described before (Seleit et al., 2017b). This was followed by *in vitro* RNA transcription using T7  
7 MEGAscript Kit (Ambion) and cleaned-up using RNAeasy kit (Qiagen). The gRNAs were co-  
8 injected at 15 ng/μl each along with 150 ng/μl of CAS9 mRNA into Tg(*Eya1*:EGFP), Tg(*Eya1*:mCFP),  
9 Tg(*K15*:H2BGFP), Tg(*K15*:LifeActRFP) one-cell-stage medaka embryos. To check for gRNA  
10 efficiency the following genotyping primers were used: *krt15 fwd*, GGGACCAGAGTCTCTGTTTCC,  
11 *krt15 rev*, TTGGTGTTCATGTCGTTGC.

12 Individual adults of the F2 mutant lines were genotyped by PCR using *krt15 fwd* and *krt15 rev* primers  
13 the amplicons were analysed by Sanger sequencing. We identified several alleles that are described  
14 in Supplementary Figure 1. In the coming generations, pLL phenotypes were checked for the *krt15*  
15 mutation. *krt15*<sup>D594</sup> / + adults were incrossed and their progeny sorted for primary neuromasts  
16 stucked in the midline. A genotyping PCR confirm that these fish were indeed *krt15*<sup>D594</sup> mutants  
17 (15/16 *krt15*<sup>D594</sup> homozygous, 1/16 *krt15*<sup>D594</sup> heterozygous).

18

## 19 **Transplantation assay**

20 Blastula stage transplantations in medaka were carried out as previously described (Rembold et al.,  
21 2006). Briefly 10-35 cells were transplanted from *Gaudi*<sup>LoxPOUT</sup> (ubiquitously expressing H2B-GFP),  
22 or (*K15*:H2B-RFP) donors into *krt15* mutant hosts, and from *krt15* mutant donors (*Eya1*:GFP and  
23 *K15*:H2BGFP) into wt hosts. Transplanted embryos were kept in 1× ERM supplemented with  
24 antibiotics (penicillin-streptomycin solution from Sigma, P0781) and selected for fluorescent  
25 expression in the primordium. Positively transplanted fish with labelled donor cells in the neuromasts  
26 or in the vicinity of the neuromasts were analysed at stage 42 under a fluorescent binocular or under  
27 a confocal microscope.

28

## 29 **Live-imaging and sample preparation**

30 For dechorionisation, embryos were rolled on commercially available sand-paper, washed in 1 X  
31 ERM, treated with hatching enzyme for 30-50 minutes at 28 °C, and washed abundantly in ERM to



1 remove any residual enzyme. All live-imaging was done as previously described (Seleit et al., 2017a,  
2 b). Briefly, dechorionated embryos or hatchlings were anaesthetised in 1x ERM supplemented with  
3 Tricaine (Sigma-Aldrich, A5040) and then mounted in 0.6% low melting agarose on glass bottom  
4 dishes (MatTek corporation). Embryo screening was performed using either the Olympus MVX10  
5 macrofluorescence binocular. Live-imaging was done using the MuVi-SPIM (Krzic et al., 2012) with  
6 two illumination objectives (10x Nikon Plan Fluorite Objective, 0.30 NA) and two detection objectives  
7 (16X Nikon CFI LWD Plan Fluorite Objective, 0.80 NA). Additional live-imaging was done using the  
8 confocal laser-scanning microscope Leica TCS SPE (40x oil objective) or Leica TCS SP5 II (10X  
9 dry, 40x dH<sub>2</sub>O objectives). Samples were placed in the Microscope Slide Temperature Controller  
10 from Biotronix to control temperature.

11

## 12 **Image and data analysis**

13 All Image analysis was done using FIJI and ImageJ. Image stitching utilized 2D and 3D stitching  
14 plug-ins on ImageJ. All registration of imaging time-stamping, manual tracking, and manual  
15 segmentation of cells, was done using standard FIJI plug-ins.

16

## 17 **Stainings**

18 **Immunohistochemistry:** IHC were performed on fixed medaka embryos as described before  
19 (Centanin et al., 2014). Primary antibodies used were Anti-eGFP Rabbit (Invitrogen, 1:500) and anti-  
20 tRFP Rabbit (Evrogen, 1:250). Secondary antibodies used were goat anti-Rabbit Alexa Fluor 488  
21 (Invitrogen, 1:500), goat anti-Rabbit Alexa Fluor 546 (Invitrogen, 1:500). For DAPI staining a final  
22 concentration of 5 ug/l was used.

23

24 **Double in situ Hybridisation:** Samples were prepared as previously described (Seleit et al., 2017a).  
25 Hybridisation was performed with the *eya1* (DIG) and *krt15* (Fluo) probes in hybridisation mix  
26 overnight at 65°C. All following washing steps were done with TNT (0.1M Tris pH 7.5, 0.15M NaCl,  
27 0.1% Tween20). The samples were blocked in 2% TNB (2% blocking reagent (Roche, REF 11 096  
28 176 001) in TNT for 2-3 h at room temperature and incubated with an anti-Fluo-POD antibody (1/50,  
29 Sigma-Aldrich REF 11 426 346 910) in 2% TNB overnight at 4°C. On the next day after washing  
30 detection of the *krt15* probe was performed using the PerkinElmer TSATM-Plus Fluorescein System  
31 (NEL741B001KT). To stop all remaining POD enzyme activity the samples were incubated 20

1 minutes in 2% H<sub>2</sub>O<sub>2</sub> in TNT. For visualization of the *eya1* probe the samples were incubated with  
2 an anti-Dig-POD antibody (1/50 in 2% TNB, Sigma-Aldrich REF 11 207 733 910) and DAPI (1/1000)  
3 overnight at 4°C. Detection of the *eya1* probe was performed using the PerkinElmer TSATM-Plus  
4 Cyanine 3 System (NEL744B001KT). The embryos were mounted in 0.6% low melting agarose in  
5 PTW and imaged at a confocal microscope.

6

7 **DiAsp:** Hair cells in neuromasts were visualised using the vital dye 4-Di-2-ASP (Sigma-Aldrich) as  
8 previously described (Sapède et al., 2002; Seleit et al., 2017a). Live samples were incubated for 5-  
9 10 min in a 5 mM DiAsp solution, washed in ERM and analysed using a fluorescent binocular.

10

## 11 **2-photon laser ablation**

12 For pLL nerve ablations a multi-photon laser coupled to a Leica TCS SP5 II microscope was used.  
13 Conditions varied across the replicates, the 'point ablation' function was utilised using 880 nm  
14 wavelength and a laser power between 30-50 % for a timeframe of 300-800 ms. A section of the pLL  
15 nerve was chosen and from 6-20 sequential points were ablated. Directly after injury the pLL nerve  
16 was imaged to check the efficiency of targeting the nerve. In other experiments, we targeted 5-15  
17 EYFP positive epithelial cell membranes underneath the primordium and latest deposited  
18 neuromasts in Tg(*K15:mEYFP*) 3-4 dpf embryos during pLL pattern construction. Point ablation  
19 settings were used and laser power varied between 30-52 % with a time frame of 200-300 ms.  
20 Embryos were imaged before and after to check the success of targeting.

## 1 References

- 2 Aman, A., and Piotrowski, T. (2008). Wnt/ $\beta$ -Catenin and Fgf Signaling Control Collective Cell Migration  
3 by Restricting Chemokine Receptor Expression. *Developmental cell* *15*, 749-761.
- 4 Andermann, P., Ungos, J., and Raible, D.W. (2002). Neurogenin1 defines zebrafish cranial sensory  
5 ganglia precursors. *Developmental Biology* *251*, 45-58.
- 6 Anderson, C., and Stern, C.D. (2016). Organizers in Development. *Curr Top Dev Biol* *117*, 435-454.
- 7 Bose, A., Teh, M.T., Mackenzie, I.C., and Waseem, A. (2013). Keratin k15 as a biomarker of epidermal  
8 stem cells. *Int J Mol Sci* *14*, 19385-19398.
- 9 Carroll, S.B. (2005). *Endless forms most beautiful : the new science of evo devo and the making of the*  
10 *animal kingdom*, 1st ed edn (New York: Norton).
- 11 Centanin, L., Ander, J.-J., Hoeckendorf, B., Lust, K., Kellner, T., Kraemer, I., Urbany, C., Hasel, E., Harris,  
12 W.A., Simons, B.D., *et al.* (2014). Exclusive multipotency and preferential asymmetric divisions in post-  
13 embryonic neural stem cells of the fish retina. *Development (Cambridge, England)* *141*, 3472-3482.
- 14 Chamcheu, J.C., Siddiqui, I.A., Syed, D.N., Adhami, V.M., Liovic, M., and Mukhtar, H. (2011). Keratin  
15 gene mutations in disorders of human skin and its appendages. *Arch Biochem Biophys* *508*, 123-137.
- 16 Chan, Y.F., Marks, M.E., Jones, F.C., Villarreal, G., Jr., Shapiro, M.D., Brady, S.D., Southwick, A.M.,  
17 Absher, D.M., Grimwood, J., Schmutz, J., *et al.* (2010). Adaptive evolution of pelvic reduction in  
18 sticklebacks by recurrent deletion of a Pitx1 enhancer. *Science* *327*, 302-305.
- 19 Chitnis, A.B., Nogare, D.D., and Matsuda, M. (2012). Building the posterior lateral line system in  
20 zebrafish. *Developmental Neurobiology* *72*, 234-255.
- 21 Coombs, S., Bleckmann, H., Fay, R.R., and Popper, A.N., eds. (2014). *The Lateral Line System* (New  
22 York, NY: Springer New York).
- 23 Coombs, S., Janssen, J., and Webb, J.F. (1988). Diversity of Lateral Line Systems: Evolutionary and  
24 Functional Considerations. In (New York, NY: Springer New York), pp. 553-593.
- 25 Cvekl, A., and Ashery-Padan, R. (2014). The cellular and molecular mechanisms of vertebrate lens  
26 development. *Development (Cambridge, England)* *141*, 4432-4447.
- 27 David, N.B., Sapède, D., Saint-Etienne, L., Thisse, C., Thisse, B., Dambly-Chaudière, C., Rosa, F.M.,  
28 and Ghysen, A. (2002). Molecular basis of cell migration in the fish lateral line: role of the chemokine  
29 receptor CXCR4 and of its ligand, SDF1. *Proceedings of the National Academy of Sciences of the*  
30 *United States of America* *99*, 16297-16302.
- 31 Eiraku, M., Takata, N., Ishibashi, H., Kawada, M., Sakakura, E., Okuda, S., Sekiguchi, K., Adachi, T.,  
32 and Sasai, Y. (2011). Self-organizing optic-cup morphogenesis in three-dimensional culture. *Nature*  
33 *472*, 51-56.
- 34 Ghysen, A., and Dambly-Chaudière, C. (2016). Development vs. behavior: a role for neural adaptation  
35 in evolution? *Int J Dev Biol* *60*, 77-84.
- 36 Ghysen, A., and Dambly-Chaudière, C. (2007). The lateral line microcosmos. *Genes & development* *21*,  
37 2118-2130.
- 38 Ghysen, A., Dambly-Chaudière, C., Coves, D., de la Gandara, F., and Ortega, A. (2012). Developmental  
39 origin of a major difference in sensory patterning between zebrafish and bluefin tuna. *Evolution and*  
40 *Development* *14*, 204-211.
- 41 Ghysen, A., Schuster, K., Coves, D., de la Gandara, F., Papandroulakis, N., and Ortega, A. (2010).  
42 Development of the posterior lateral line system in *Thunnus thynnus*, the Atlantic blue-fin tuna, and in  
43 its close relative *Sarda sarda*. *The International journal of developmental biology* *54*, 1317-1322.

- 1 Gilmour, D.T., Maischein, H.-M., and Nüsslein-Volhard, C. (2002). Migration and function of a glial  
2 subtype in the vertebrate peripheral nervous system. *Neuron* *34*, 577-588.
- 3 Giroux, V., Lento, A.A., Islam, M., Pitarresi, J.R., Kharbanda, A., Hamilton, K.E., Whelan, K.A., Long, A.,  
4 Rhoades, B., Tang, Q., *et al.* (2017). Long-lived keratin 15+ esophageal progenitor cells contribute to  
5 homeostasis and regeneration. *J Clin Invest* *127*, 2378-2391.
- 6 Giroux, V., Stephan, J., Chatterji, P., Rhoades, B., Wileyto, E.P., Klein-Szanto, A.J., Lengner, C.J.,  
7 Hamilton, K.E., and Rustgi, A.K. (2018). Mouse Intestinal Krt15+ Crypt Cells Are Radio-Resistant and  
8 Tumor Initiating. *Stem Cell Reports* *10*, 1947-1958.
- 9 Gompel, N., Cubedo, N., Thisse, C., Thisse, B., Dambly-Chaudiere, C., and Ghysen, A. (2001). Pattern  
10 formation in the lateral line of zebrafish. *Mech Dev* *105*, 69-77.
- 11 Grant, K.A., Raible, D.W., and Piotrowski, T. (2005). Regulation of latent sensory hair cell precursors by  
12 glia in the zebrafish lateral line. *Neuron* *45*, 69-80.
- 13 Haas, P., and Gilmour, D. (2006). Chemokine signaling mediates self-organizing tissue migration in the  
14 zebrafish lateral line. *Developmental cell* *10*, 673-680.
- 15 Haines, R.L., and Lane, E.B. (2012). Keratins and disease at a glance. *J Cell Sci* *125*, 3923-3928.
- 16 Hernández, P.P., Moreno, V., Olivari, F.A., and Allende, M.L. (2006). Sub-lethal concentrations of  
17 waterborne copper are toxic to lateral line neuromasts in zebrafish (*Danio rerio*). *Hearing research* *213*,  
18 1-10.
- 19 Indjeian, V.B., Kingman, G.A., Jones, F.C., Guenther, C.A., Grimwood, J., Schmutz, J., Myers, R.M., and  
20 Kingsley, D.M. (2016). Evolving New Skeletal Traits by cis-Regulatory Changes in Bone Morphogenetic  
21 Proteins. *164*, 45-56.
- 22 Ito, K., Morioka, M., Kimura, S., Tasaki, M., Inohaya, K., and Kudo, A. (2014). Differential reparative  
23 phenotypes between zebrafish and medaka after cardiac injury. *Developmental Dynamics* *243*, 1106-  
24 1115.
- 25 Jones, F.C., Grabherr, M.G., Chan, Y.F., Russell, P., Mauceli, E., Johnson, J., Swofford, R., Pirun, M.,  
26 Zody, M.C., White, S., *et al.* (2012). The genomic basis of adaptive evolution in threespine sticklebacks.  
27 *Nature* *484*, 55-61.
- 28 Lai, S.L., Marin-Juez, R., Moura, P.L., Kuenne, C., Lai, J.K.H., Tsedeke, A.T., Guenther, S., Looso, M.,  
29 and Stainier, D.Y. (2017). Reciprocal analyses in zebrafish and medaka reveal that harnessing the  
30 immune response promotes cardiac regeneration. *Elife* *6*.
- 31 Lancaster, M.A., Renner, M., Martin, C.-A., Wenzel, D., Bicknell, L.S., Hurlles, M.E., Homfray, T.,  
32 Penninger, J.M., Jackson, A.P., and Knoblich, J.A. (2013). Cerebral organoids model human brain  
33 development and microcephaly. *Nature* *501*, 373-379.
- 34 Lecaudey, V., Cakan-Akdogan, G., Norton, W.H.J., and Gilmour, D. (2008). Dynamic Fgf signaling  
35 couples morphogenesis and migration in the zebrafish lateral line primordium. *135*, 2695-2705.
- 36 Ledent, V. (2002). Postembryonic development of the posterior lateral line in zebrafish. *129*, 597-604.
- 37 Liu, Y., Lyle, S., Yang, Z., and Cotsarelis, G. (2003). Keratin 15 promoter targets putative epithelial stem  
38 cells in the hair follicle bulge. *J Invest Dermatol* *121*, 963-968.
- 39 López-Schier, H., and Hudspeth, A.J. (2005). Supernumerary neuromasts in the posterior lateral line of  
40 zebrafish lacking peripheral glia. *Proceedings of the National Academy of Sciences of the United States*  
41 *of America* *102*, 1496-1501.
- 42 Lush, M.E., and Piotrowski, T. (2014). ErbB expressing Schwann cells control lateral line progenitor cells  
43 via non-cell-autonomous regulation of Wnt/β-catenin. *eLife* *3*, e01832.
- 44 Lust, K., and Wittbrodt, J. (2018). Activating the regenerative potential of Muller glia cells in a  
45 regeneration-deficient retina. *Elife* *7*.

- 1 Ma, E.Y., Rubel, E.W., and Raible, D.W. (2008). Notch signaling regulates the extent of hair cell  
2 regeneration in the zebrafish lateral line. *The Journal of neuroscience : the official journal of the Society*  
3 *for Neuroscience* 28, 2261-2273.
- 4 Martinez Arias, A., and Steventon, B. (2018). On the nature and function of organizers. *Development*  
5 145.
- 6 McLean, C.Y., Reno, P.L., Pollen, A.A., Bassan, A.I., Capellini, T.D., Guenther, C., Indjeian, V.B., Lim,  
7 X., Menke, D.B., Schaar, B.T., *et al.* (2011). Human-specific loss of regulatory DNA and the evolution  
8 of human-specific traits. *Nature* 471, 216-219.
- 9 Moriyama, Y., Kawanishi, T., Nakamura, R., Tsukahara, T., Sumiyama, K., Suster, M.L., Kawakami, K.,  
10 Toyoda, A., Fujiyama, A., Yasuoka, Y., *et al.* (2012). The medaka *zic1/zic4* mutant provides molecular  
11 insights into teleost caudal fin evolution. *Curr Biol* 22, 601-607.
- 12 Nechiporuk, A., and Raible, D.W. (2008). FGF-dependent mechanosensory organ patterning in  
13 zebrafish. *Science (New York, NY)* 320, 1774-1777.
- 14 Nogare, D.D., Natesh, N., and Chitnis, A. (2019). A sheath of motile cells supports collective migration  
15 in of the Zebrafish posterior lateral line primordium under the skin. *bioRxiv*, 783043.
- 16 Nuñez, V.A., Sarrazin, A.F., Cubedo, N., Allende, M.L., Dambly-Chaudière, C., and Ghysen, A. (2009).  
17 Postembryonic development of the posterior lateral line in the zebrafish. *Evolution and Development*  
18 11, 391-404.
- 19 O'Brown, N.M., Summers, B.R., Jones, F.C., Brady, S.D., and Kingsley, D.M. (2015). A recurrent  
20 regulatory change underlying altered expression and Wnt response of the stickleback armor plates  
21 gene *EDA*. *Elife* 4, e05290.
- 22 Ohtsuka, M., Kikuchi, N., Yokoi, H., Kinoshita, M., Wakamatsu, Y., Ozato, K., Takeda, H., Inoko, H., and  
23 Kimura, M. (2004). Possible roles of *zic1* and *zic4*, identified within the medaka Double anal fin (*Da*)  
24 locus, in dorsoventral patterning of the trunk-tail region (related to phenotypes of the *Da* mutant). *Mech*  
25 *Dev* 121, 873-882.
- 26 Peters, B., Kirfel, J., Bussow, H., Vidal, M., and Magin, T.M. (2001). Complete cytolysis and neonatal  
27 lethality in keratin 5 knockout mice reveal its fundamental role in skin integrity and in epidermolysis  
28 bullosa simplex. *Mol Biol Cell* 12, 1775-1789.
- 29 Pichon, F., and Ghysen, A. (2004). Evolution of posterior lateral line development in fish and amphibians.  
30 *Evolution and Development* 6, 187-193.
- 31 Pinto-Teixeira, F., Viader-Llargués, O., Torres-Mejía, E., Turan, M., González-Gualda, E., Pola-Morell,  
32 L., and López-Schier, H. (2015). Inexhaustible hair-cell regeneration in young and aged zebrafish.  
33 *Biology open* 4, 903-909.
- 34 Prud'homme, B., Gompel, N., Rokas, A., Kassner, V.A., Williams, T.M., Yeh, S.D., True, J.R., and Carroll,  
35 S.B. (2006). Repeated morphological evolution through cis-regulatory changes in a pleiotropic gene.  
36 *Nature* 440, 1050-1053.
- 37 Rembold, M., Loosli, F., Adams, R.J., and Wittbrodt, J. (2006). Individual cell migration serves as the  
38 driving force for optic vesicle evagination. *Science (New York, NY)* 313, 1130-1134.
- 39 Romero-Carvajal, A., Navajas Acedo, J., Jiang, L., Kozlovskaja-Gumbriené, A., Alexander, R., Li, H.,  
40 and Piotrowski, T. (2015). Regeneration of Sensory Hair Cells Requires Localized Interactions between  
41 the Notch and Wnt Pathways. *Developmental cell* 34, 267-282.
- 42 Sánchez, M., Ceci, M.L., Gutiérrez, D., Anguita-Salinas, C., and Allende, M.L. (2016). Mechanosensory  
43 organ regeneration in zebrafish depends on a population of multipotent progenitor cells kept latent by  
44 Schwann cells. *BMC biology* 14, 27.
- 45 Sapède, D., Gompel, N., Dambly-Chaudière, C., and Ghysen, A. (2002). Cell migration in the  
46 postembryonic development of the fish lateral line. *Development (Cambridge, England)* 129, 605-615.



- 1 Sarrazin, A.F., Nuñez, V.A., Sapède, D., Tassin, V., Dambly-Chaudière, C., and Ghysen, A. (2010).  
2 Origin and early development of the posterior lateral line system of zebrafish. *The Journal of*  
3 *neuroscience : the official journal of the Society for Neuroscience* *30*, 8234-8244.
- 4 Sato, T., Vries, R.G., Snippert, H.J., van de Wetering, M., Barker, N., Stange, D.E., van Es, J.H., Abo,  
5 A., Kujala, P., Peters, P.J., *et al.* (2009). Single Lgr5 stem cells build crypt-villus structures in vitro  
6 without a mesenchymal niche. *Nature* *459*, 262-265.
- 7 Seleit, A., Krämer, I., Ambrosio, E., Dross, N., Engel, U., and Centanin, L. (2017a). Sequential  
8 organogenesis sets two parallel sensory lines in medaka. *Development (Cambridge, England)* *144*,  
9 687-697.
- 10 Seleit, A., Krämer, I., Riebesehl, B.F., Ambrosio, E.M., Stolper, J.S., Lischik, C.Q., Dross, N., and  
11 Centanin, L. (2017b). Neural stem cells induce the formation of their physical niche during  
12 organogenesis. *eLife* *6*, e29173.
- 13 Stemmer, M., Thumberger, T., Del Sol Keyer, M., Wittbrodt, J., and Mateo, J.L. (2015). CCTop: An  
14 Intuitive, Flexible and Reliable CRISPR/Cas9 Target Prediction Tool. *10*, e0124633.
- 15 Storey, K.G., Crossley, J.M., De Robertis, E.M., Norris, W.E., and Stern, C.D. (1992). Neural induction  
16 and regionalisation in the chick embryo. *Development* *114*, 729-741.
- 17 Sulston, J.E., Schierenberg, E., White, J.G., and Thomson, J.N. (1983). The embryonic cell lineage of  
18 the nematode *Caenorhabditis elegans*. *Developmental Biology* *100*, 64-119.
- 19 Thermes, V., Grabher, C., Ristoratore, F., Bourrat, F., Choulika, A., Wittbrodt, J., and Joly, J.-S. (2002).  
20 I-SceI meganuclease mediates highly efficient transgenesis in fish. *Mechanisms of development* *118*,  
21 91-98.
- 22 Turner, D.A., Baillie-Johnson, P., and Martinez Arias, A. (2016). Organoids and the genetically encoded  
23 self-assembly of embryonic stem cells. *BioEssays : news and reviews in molecular, cellular and*  
24 *developmental biology* *38*, 181-191.
- 25 van den Brink, S.C., Baillie-Johnson, P., Balayo, T., Hadjantonakis, A.-K., Nowotschin, S., Turner, D.A.,  
26 and Martinez Arias, A. (2014). Symmetry breaking, germ layer specification and axial organisation in  
27 aggregates of mouse embryonic stem cells. *141*, 4231-4242.
- 28 Wada, H., Dambly-Chaudière, C., Kawakami, K., and Ghysen, A. (2013a). Innervation is required for  
29 sense organ development in the lateral line system of adult zebrafish. *Proceedings of the National*  
30 *Academy of Sciences* *110*, 5659-5664.
- 31 Wada, H., Ghysen, A., Asakawa, K., Abe, G., Ishitani, T., and Kawakami, K. (2013b). Wnt/Dkk Negative  
32 Feedback Regulates Sensory Organ Size in Zebrafish. *23*, 1559-1565.
- 33 Waddington, C.H. (1941). Evolution of Developmental Systems. *Nature* *147*, 108-110.
- 34 Waddington, C.H. (1959). Canalization of development and genetic assimilation of acquired characters.  
35 *Nature* *183*, 1654-1655.
- 36 Waddington, C.H. (1968). Towards a Theoretical Biology: Vol.: 1 : Prolegomena. : An IUBSSymposium  
37 (Biological Sciences & Edinburgh University Press).
- 38 Waddington, C.H. (1969). Towards a Theoretical Biology: An IUBS Symposium. Sketches (Edinburgh  
39 University Press).
- 40 Whitfield, T.T. (2005). Lateral line: precocious phenotypes and planar polarity. *Current biology : CB* *15*,  
41 R67-70.
- 42 Wibowo, I., Pinto-Teixeira, F., Satou, C., Higashijima, S.-i., and López-Schier, H. (2011).  
43 Compartmentalized Notch signaling sustains epithelial mirror symmetry. *Development* *138*, 1143-  
44 1152.
- 45

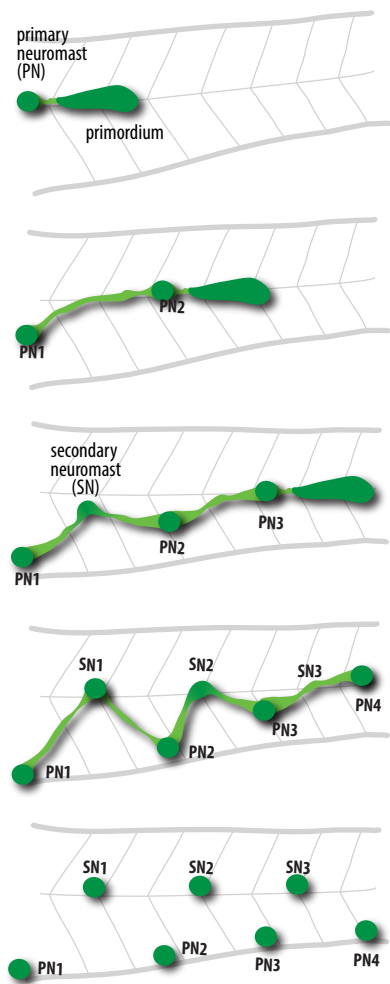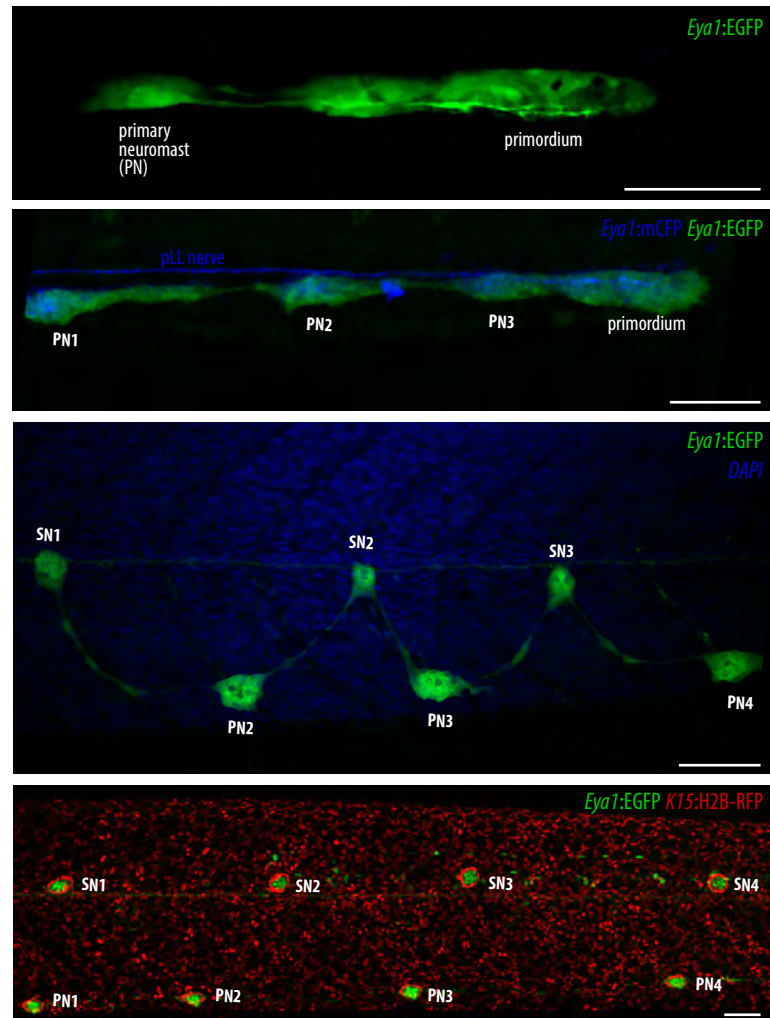

Seleit et al, Figure 1



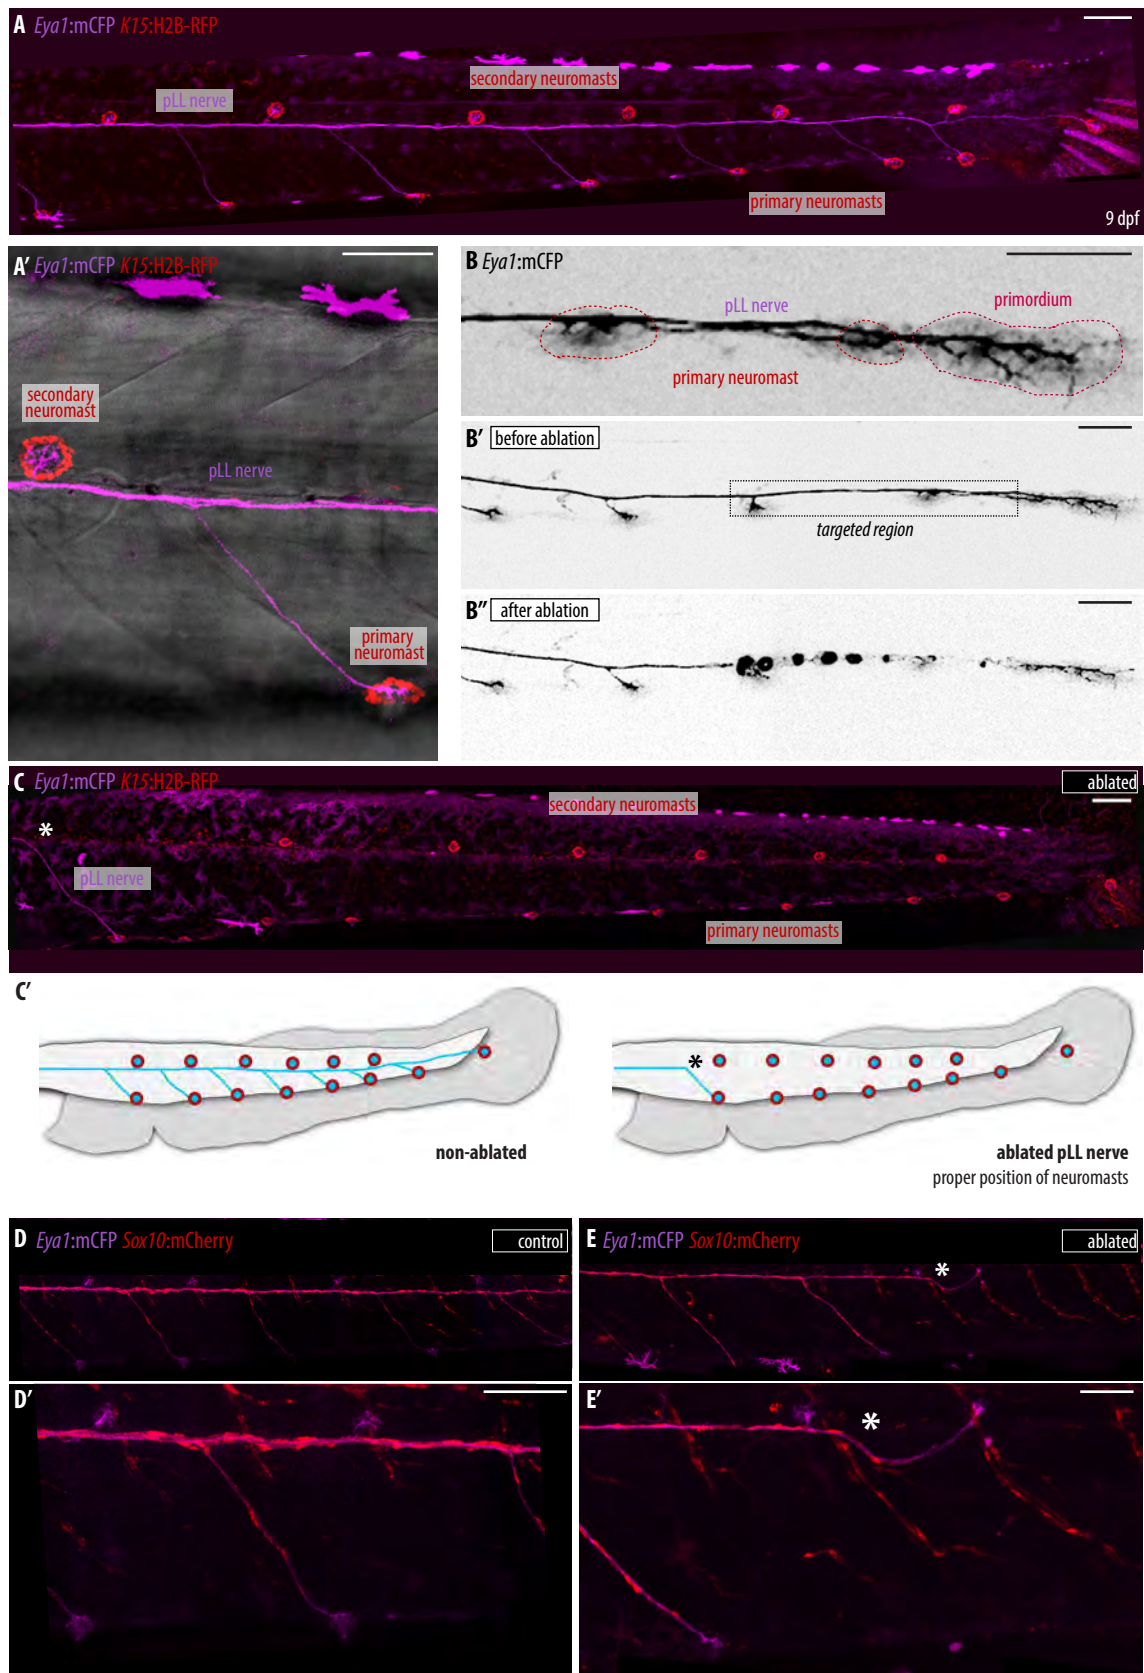

Seleit et al, Figure 2

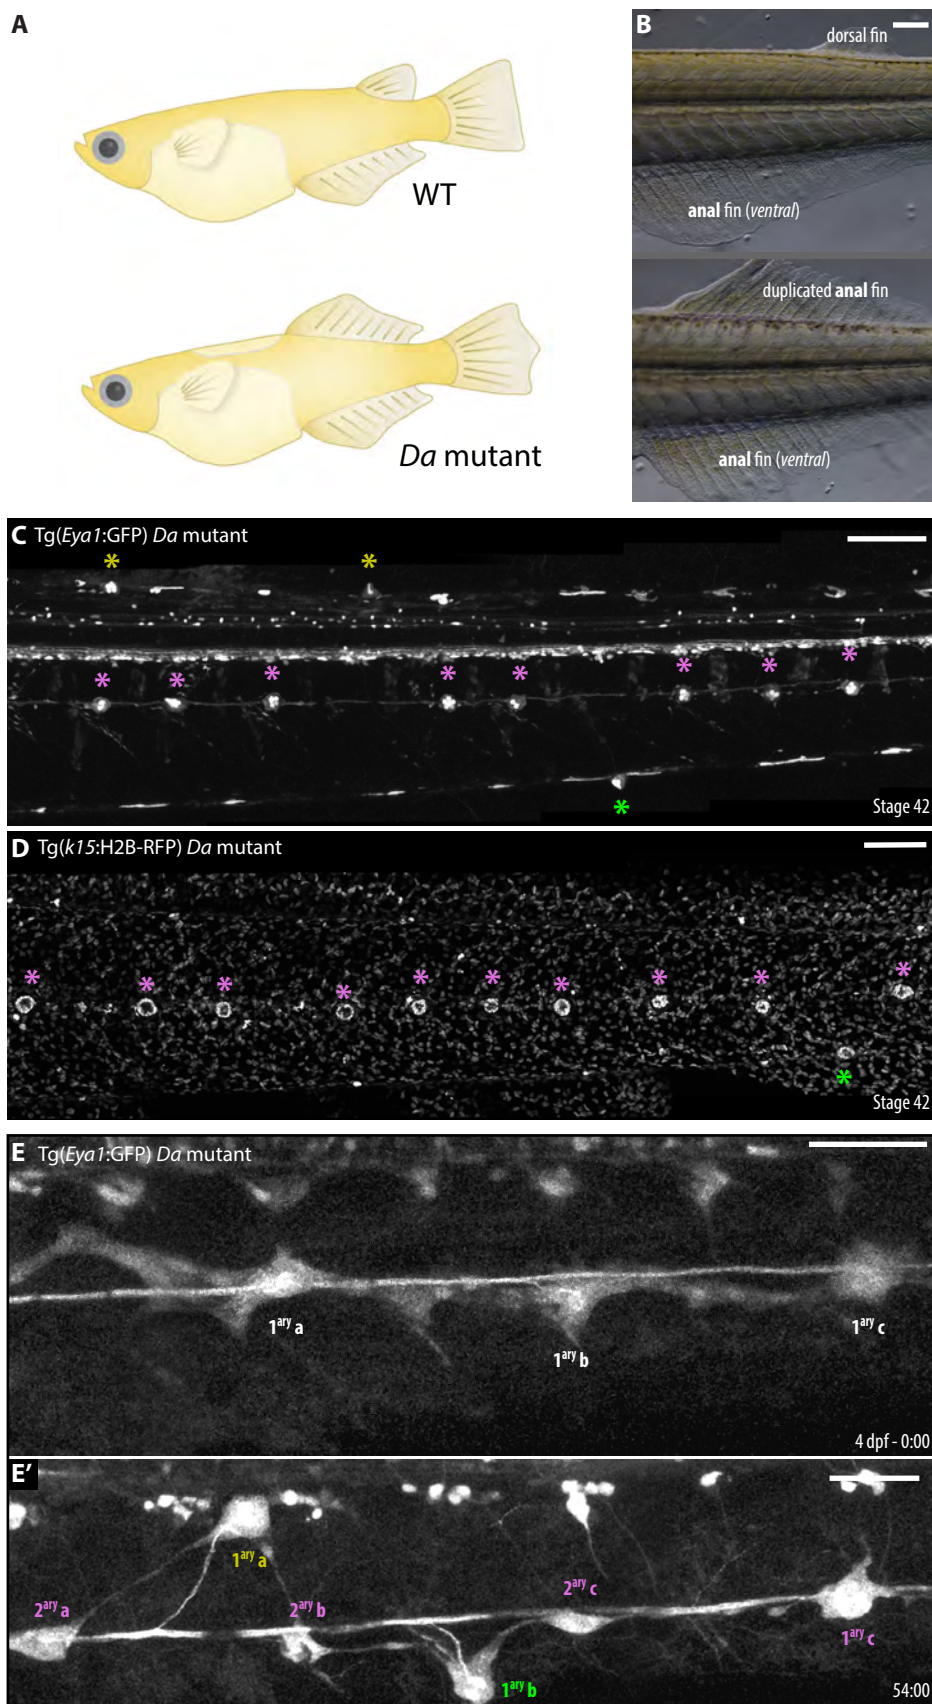

Seleit et al, Figure 3



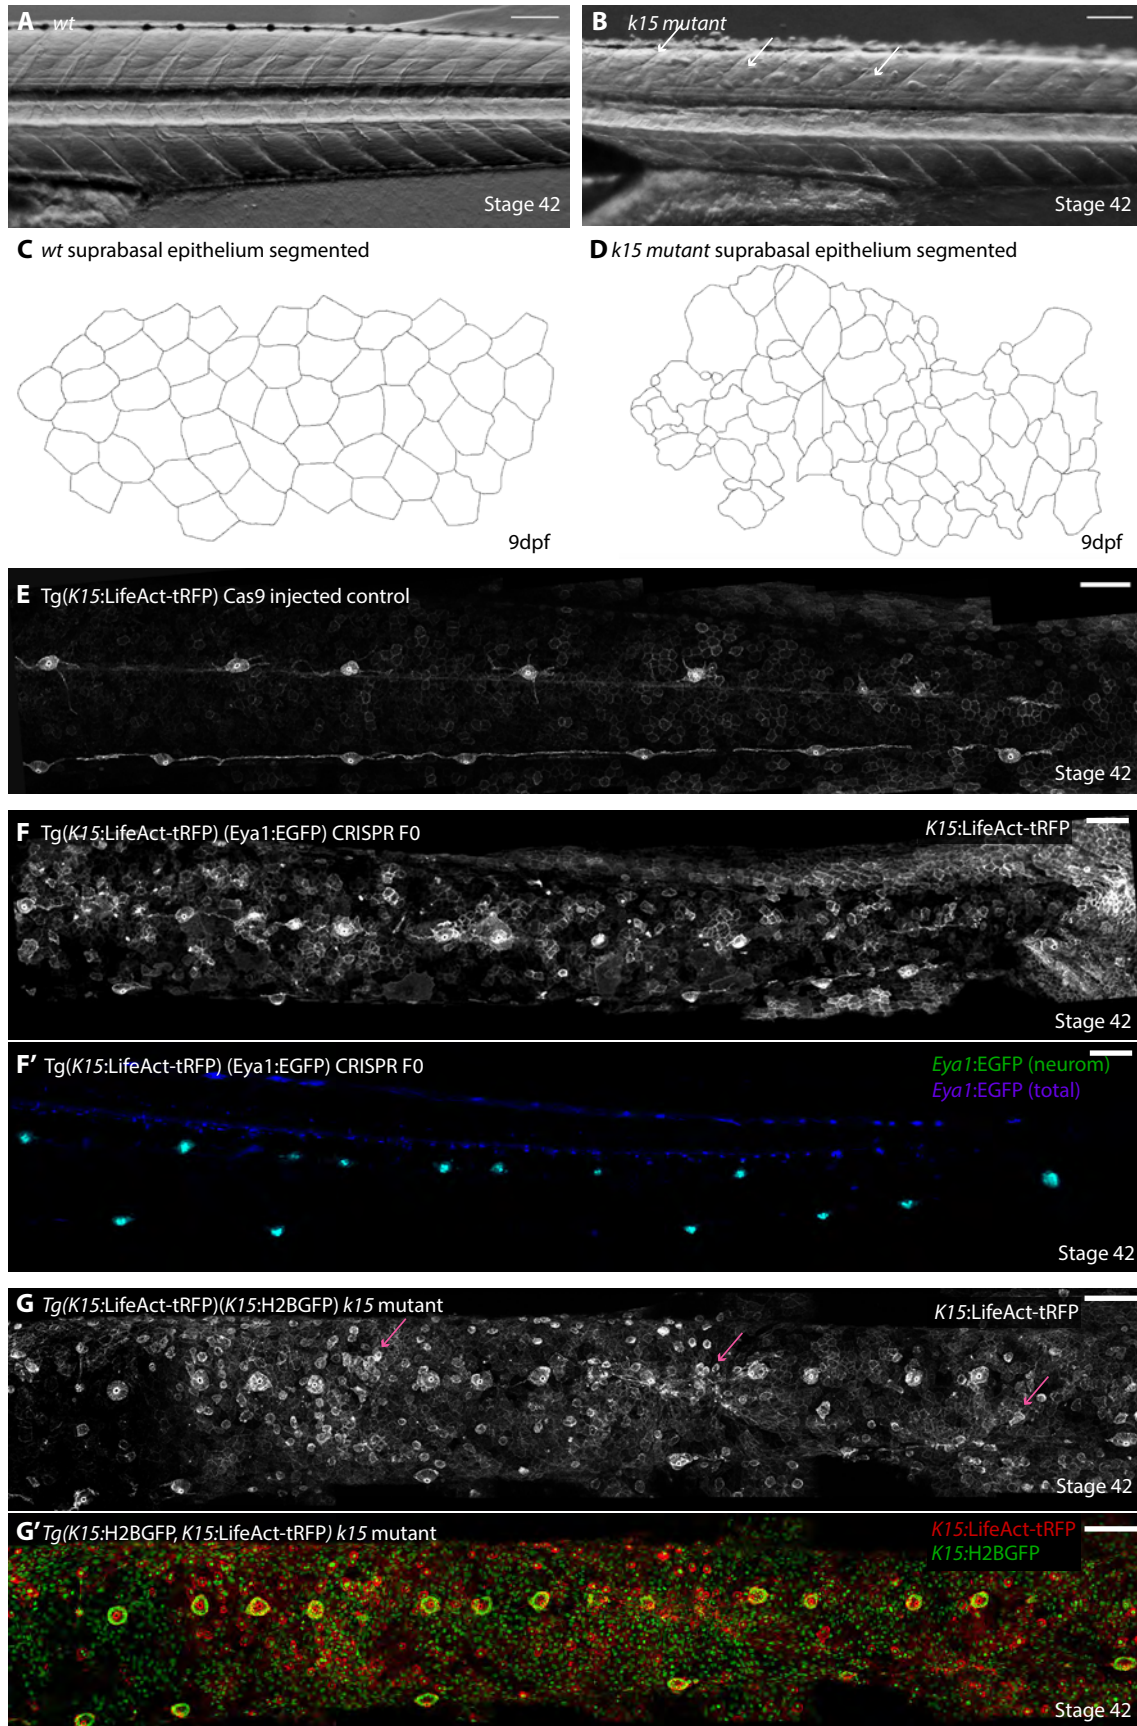

Seleit et al, Figure 4

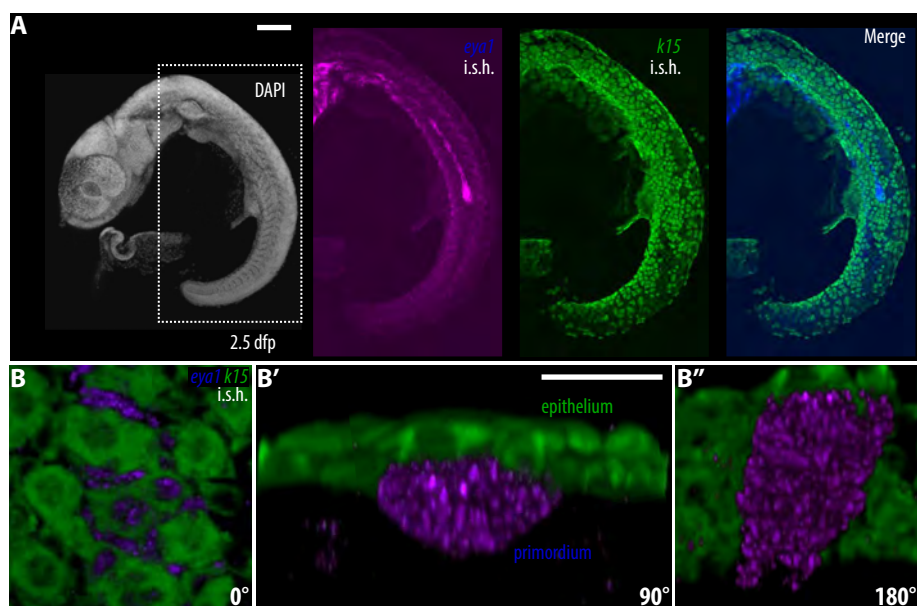

Seleit et al, Figure 5

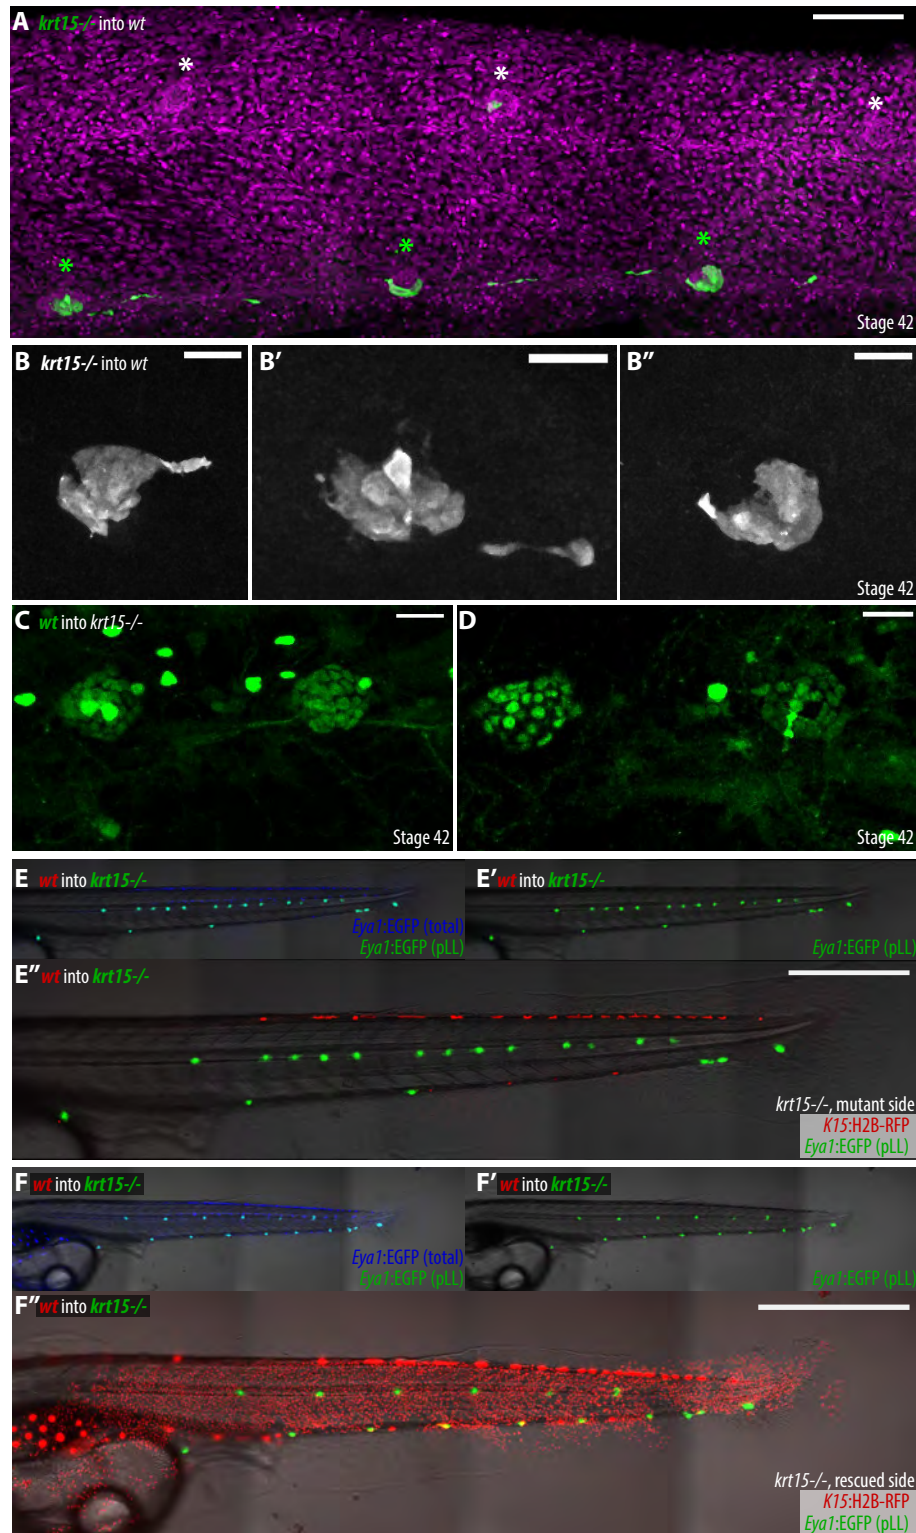

Seleit et al, Figure 6



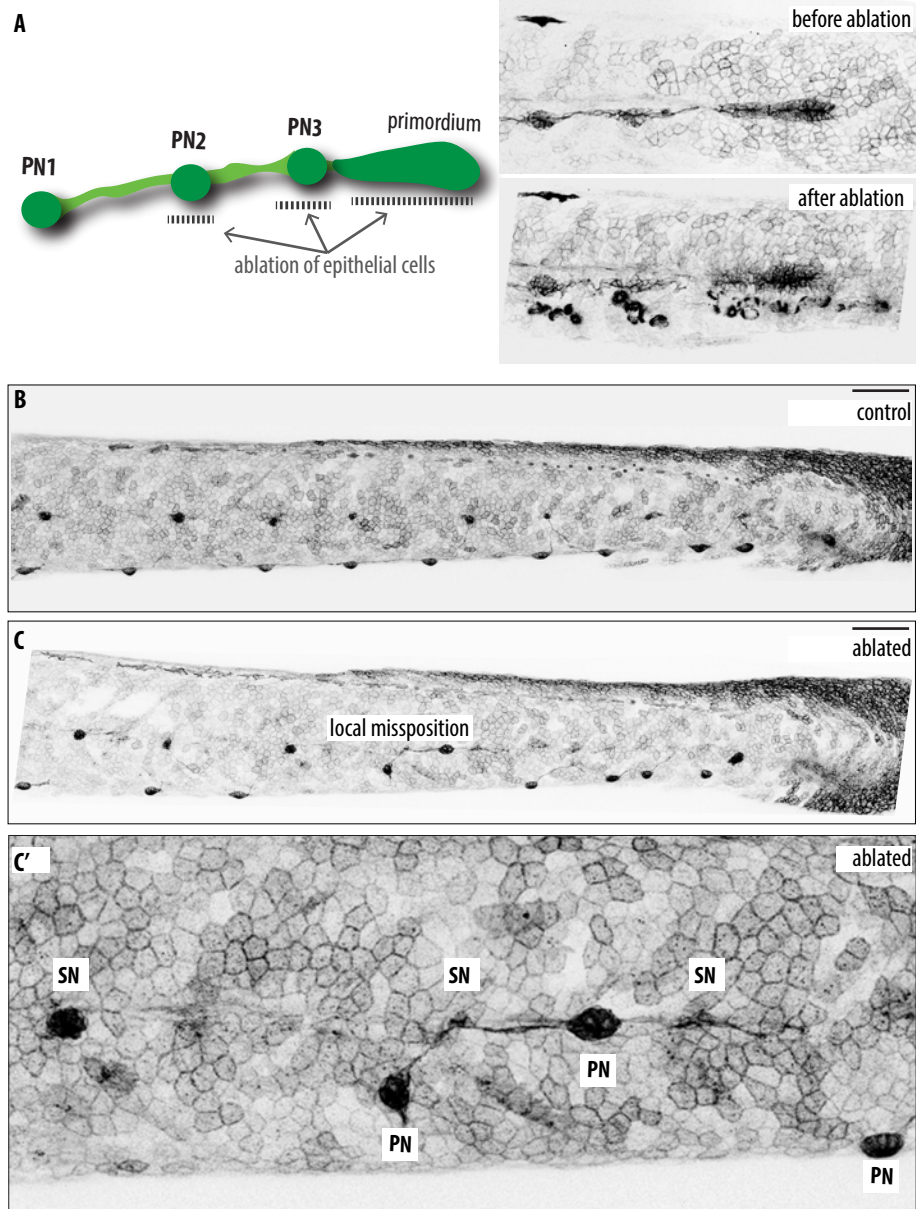

Seleit et al, Figure 7

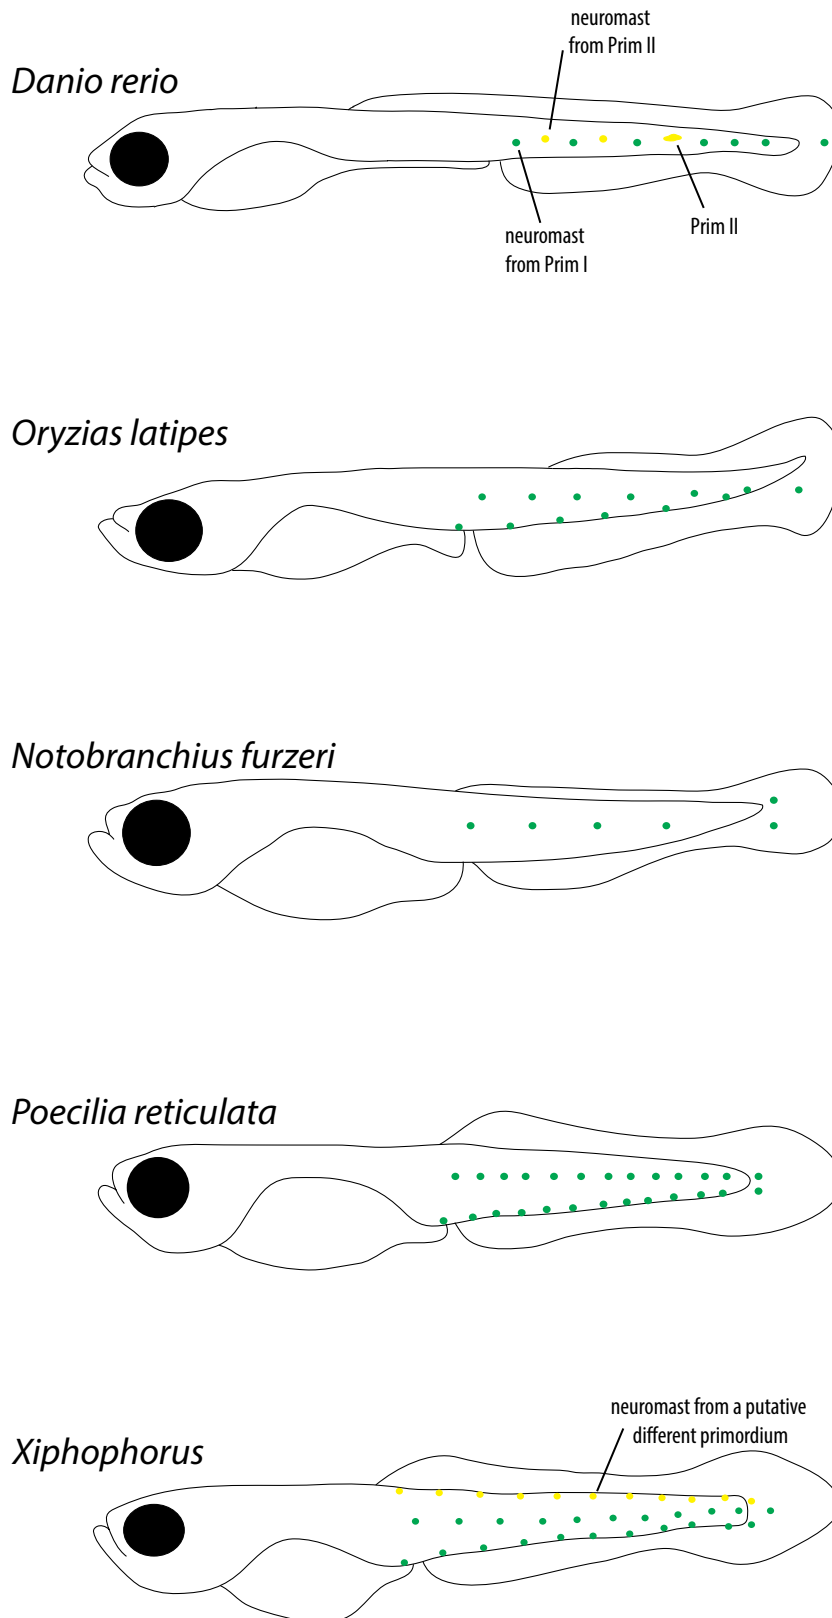

**Seleit et al, Figure 8**



200 bp

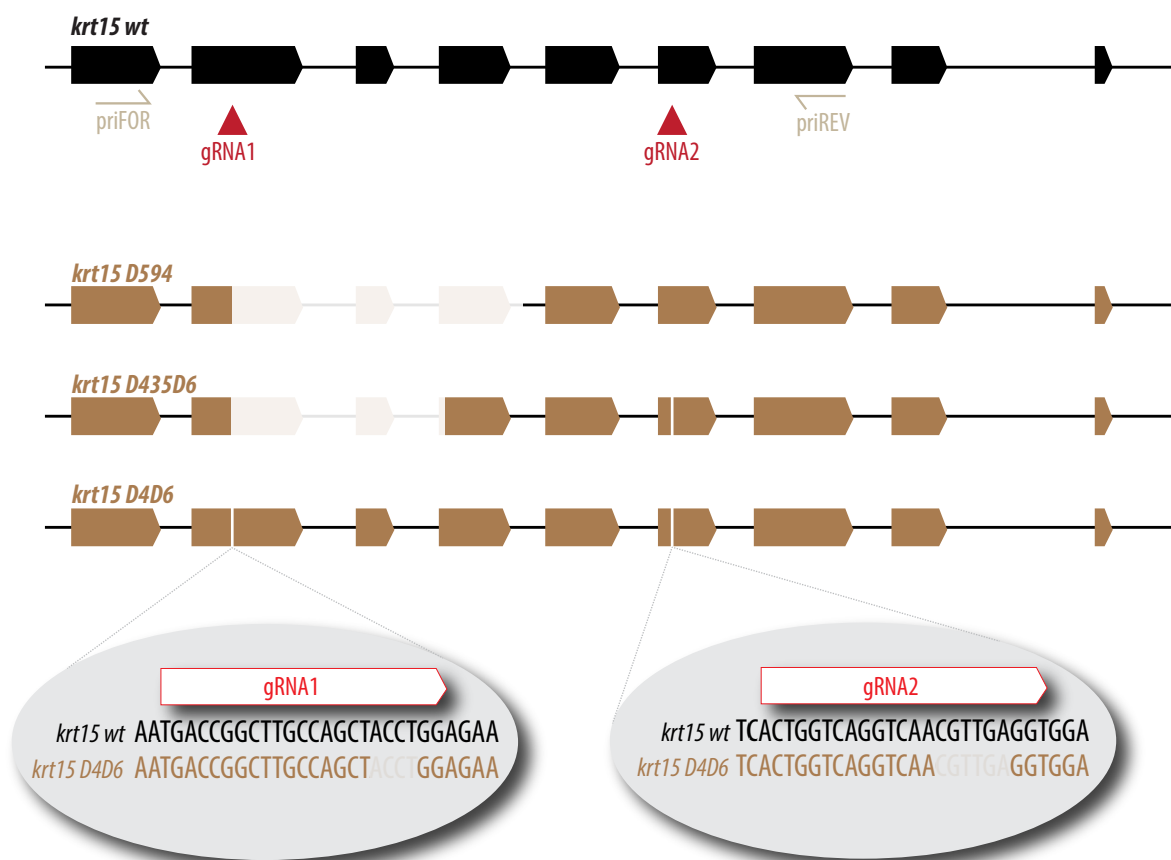

Seleit et al, Supplementary Figure 1

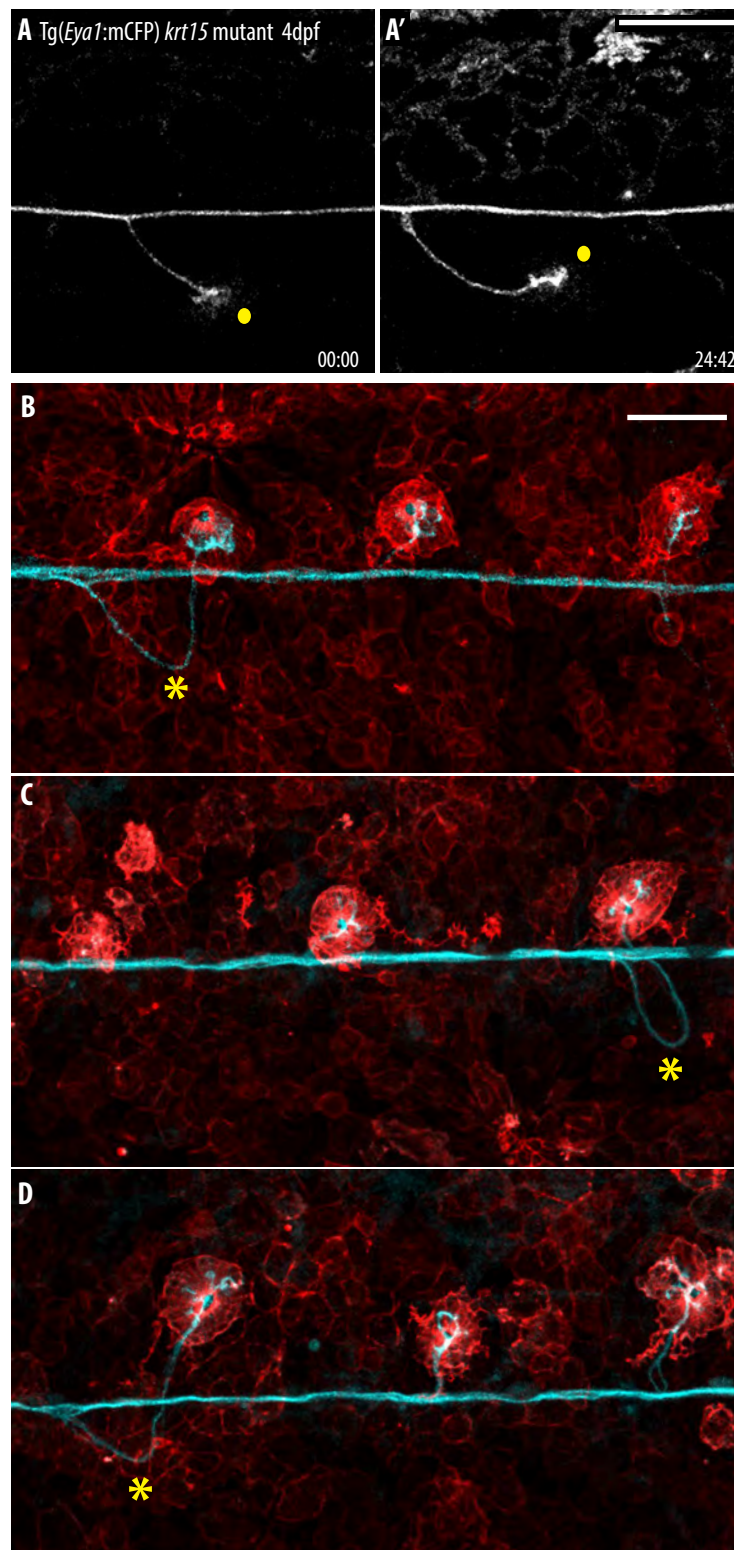

Seleit et al, Supplementary Figure 2
